## ANESTHESIOLOGY

# Pharmacotherapy for the Prevention of Chronic Pain after Surgery in Adults: An Updated Systematic Review and Meta-analysis

Meg E. Carley, B.Sc., Luis E. Chaparro, M.D., F.R.C.P.C., Manon Choinière, Ph.D., Henrik Kehlet, M.D., Ph.D., R. Andrew Moore, D.Sc., Elizabeth Van Den Kerkhof, R.N., Dr.PH., Ian Gilron, M.D., M.Sc.

*ANESTHESIOLOGY* 2021; 135:304–25

## EDITOR'S PERSPECTIVE

### What We Already Know about This Topic

- Chronic postsurgical pain is a common problem that can severely affect a patient's quality of life
- Many medications have been examined for their utility in preventing chronic postsurgical pain, but we do not understand which may be effective

### What This Article Tells Us That Is New

- Seventy randomized controlled trials were identified published since a previous meta-analysis involving drugs to prevent chronic postsurgical pain
- Overall effects of the drugs were small and of uncertain clinical relevance

Chronic postsurgical pain has been recognized as a disabling complication that can have a severe impact on patient health and quality of life, with pain that can sometimes last for a significant amount of time after surgery. On average, 10% of patients undergoing common surgical procedures will suffer from chronic pain.<sup>1–3</sup> Given the difficulty in managing chronic postsurgical pain, many efforts

to prevent the transition from acute to chronic pain have been evaluated, including perioperative administration of various systemic pharmacologic interventions. The aim of this review is to synthesize available evidence from placebo-controlled, randomized controlled trials on the effectiveness and safety of systemically administered drugs that aim to prevent the development of chronic postsurgical pain in adults

## ABSTRACT

**Background:** Chronic postsurgical pain can severely impair patient health and quality of life. This systematic review update evaluated the effectiveness of systemic drugs to prevent chronic postsurgical pain.

**Methods:** The authors included double-blind, placebo-controlled, randomized controlled trials including adults that evaluated perioperative systemic drugs. Studies that evaluated same drug(s) administered similarly were pooled. The primary outcome was the proportion reporting any pain at 3 or more months postsurgery.

**Results:** The authors identified 70 new studies and 40 from 2013. Most evaluated ketamine, pregabalin, gabapentin, IV lidocaine, nonsteroidal anti-inflammatory drugs, and corticosteroids. Some meta-analyses showed statistically significant—but of unclear clinical relevance—reductions in chronic postsurgical pain prevalence after treatment with pregabalin, IV lidocaine, and nonsteroidal anti-inflammatory drugs. Meta-analyses with more than three studies and more than 500 participants showed no effect of ketamine on prevalence of any pain at 6 months when administered for 24 h or less (risk ratio, 0.62 [95% CI, 0.36 to 1.07]; prevalence, 0 to 88% ketamine; 0 to 94% placebo) or more than 24 h (risk ratio, 0.91 [95% CI, 0.74 to 1.12]; 6 to 71% ketamine; 5 to 78% placebo), no effect of pregabalin on prevalence of any pain at 3 months (risk ratio, 0.88 [95% CI, 0.70 to 1.10]; 4 to 88% pregabalin; 3 to 80% placebo) or 6 months (risk ratio, 0.78 [95% CI, 0.47 to 1.28]; 6 to 68% pregabalin; 4 to 69% placebo) when administered more than 24 h, and an effect of pregabalin on prevalence of moderate/severe pain at 3 months when administered more than 24 h (risk ratio, 0.47 [95% CI, 0.33 to 0.68]; 0 to 20% pregabalin; 4 to 34% placebo). However, the results should be interpreted with caution given small study sizes, variable surgical types, dosages, timing and method of outcome measurements in relation to the acute pain trajectory in question, and preoperative pain status.

**Conclusions:** Despite agreement that chronic postsurgical pain is an important topic, extremely little progress has been made since 2013, likely due to study designs being insufficient to address the complexities of this multifactorial problem.

(*ANESTHESIOLOGY* 2021; 135:304–25)

This article is featured in "This Month in Anesthesiology," page A1. This article is accompanied by an editorial on p. 215. Supplemental Digital Content is available for this article. Direct URL citations appear in the printed text and are available in both the HTML and PDF versions of this article. Links to the digital files are provided in the HTML text of this article on the Journal's Web site ([www.anesthesiology.org](http://www.anesthesiology.org)). This article has a visual abstract available in the online version.

Submitted for publication December 9, 2020. Accepted for publication April 20, 2021. Published online first on June 14, 2021. From the Departments of Anesthesiology and Perioperative Medicine (M.E.C., I.G.) and Biomedical and Molecular Sciences (I.G.), Centre for Neuroscience Studies (I.G.), and School of Policy Studies (I.G.), Queen's University, Kingston, Ontario, Canada; Department of Anesthesiology and Pain Medicine, University of Toronto, Toronto, Ontario, Canada (L.E.C.); Department of Anesthesia, Toronto Western Hospital, Toronto, Ontario, Canada (L.E.C.); Department of Anesthesiology and Pain Medicine, University of Montreal, Montreal, Quebec, Canada (M.C.); Section for Surgical Pathophysiology, Rigshospitalet, Copenhagen, Denmark (H.K.); Court Road, Newton Ferrers, Plymouth, United Kingdom (R.A.M.); and School of Nursing and Midwifery, Mount Royal University, Calgary, Alberta, Canada (E.V.D.K.).

Copyright © 2021, the American Society of Anesthesiologists. All Rights Reserved. *Anesthesiology* 2021; 135:304–25. DOI: 10.1097/ALN.0000000000003837

undergoing elective surgeries. This systematic review is the first update of an original review we published in 2013<sup>4</sup> and it will describe results of an updated search of new studies published since then. The rationale for updating the review is to provide the most current and best available evidence to inform clinical decision-making for this highly relevant issue.

## Materials and Methods

This systematic review was conducted according to the original study protocol,<sup>5</sup> and in a consistent manner with the original review.<sup>4</sup> Procedures were guided by Cochrane Collaboration recommendations<sup>6</sup> and followed the principles of Preferred Reporting Items for Systematic Reviews and Meta-analysis<sup>7</sup> and A Measurement Tool to Assess Systematic Reviews.<sup>8</sup>

## Data Sources and Search Strategy

Using the originally published search strategy (Supplemental Digital Content 1, appendix A, <http://links.lww.com/ALN/C628>),<sup>4</sup> the following databases were searched for trials since the previous review (July 17, 2013, to July 1, 2019): Cochrane Central Register of Controlled Trials, MEDLINE, and EMBASE. We conducted hand searches of trial registries using each intervention as the key word (*e.g.*, ketamine and pregabalin, among others) and filtered results by interventional studies, age group (18 to 65+ yr), and outcomes (*e.g.*, chronic pain OR persistent pain OR persistent postsurgical pain). No limits were placed regarding date, language, or status of the publications. Backward reference searching was conducted by screening reference lists of included studies and relevant systematic reviews. Authors of included studies and experts were asked about recent or forthcoming studies that fit our eligibility criteria.

## Study Selection

We included double-blind, placebo-controlled, randomized controlled trials that involved participants 18 yr and older undergoing a planned surgical procedure, that evaluated one or more drugs administered systemically immediately before, during, or after the procedure by any dose, route, or frequency, and that included data on a patient-reported measure of pain 3 or more months postsurgery. This review only included randomized controlled trials because “randomization is the only way to prevent systematic differences between baseline characteristics of participants in different intervention groups in terms of both known and unknown (or unmeasured) confounders.”<sup>6</sup>

## Data Extraction and Assessment of Risk of Bias

The following was extracted for each study: drug name; trial methods; trial registration; participant demographics; preoperative pain status and analgesic use; type of surgery; dosing including route, timing, and duration; dropouts due to treatment-emergent adverse effects; concomitant

standardized analgesic approach; planned dichotomous outcomes; proportion of patients reporting any pain (more than 0 out of 10) or moderate to severe pain (greater than or equal to 4 out of 10) at 3, 6, and 12 months postsurgery. We reviewed trial registries when available, and in the case of secondary publications, original papers were reviewed. If a study reported parametric measures of pain intensity but not dichotomous measures of proportions of participants reporting pain, we contacted corresponding authors for supplementary data. Extraction was performed by M.E.C. and I.G. by reading each included study and completing the data extraction form.

Eligible studies were evaluated independently by two reviewers (M.E.C., I.G.) for risk of bias using the Cochrane risk of bias tool.<sup>9</sup> Any discrepancies could be resolved by a third coauthor (E.V.); however, this did not occur. Attrition bias was assessed as “low-risk” for studies where the dropout rate was less than 20%.<sup>10</sup> Studies with higher dropout rates that included intention-to-treat analyses were assessed as “unclear” or “high risk of bias.” Chronic pain was rarely the prespecified primary outcome and most included trials were underpowered for this outcome; therefore, “other potential sources of bias” were assessed as high-risk in studies that had fewer than 50 participants per arm.<sup>11</sup> While it could be argued that, for pain prevention trials, this number should even be higher than 50 participants per arm, there is currently no consensus for a specific higher threshold for trial size in this setting.<sup>12</sup>

## Outcome Measures

The primary outcome for the review was the proportion of participants reporting any pain at the anatomical site of the procedure or pain referred to the surgical site, or both, 3 months or more after the surgery.<sup>2</sup> Secondary outcomes were the number of participants reporting moderate to severe pain at the anatomical site of the procedure or pain referred to the surgical site—or both—6 months or more after surgery, as well as the number of participants who dropped out of the study due to treatment-related adverse effects. All results reported represent aggregate data from the 2013 and current review, unless otherwise specified.

## Statistical Analysis

Comparing the study drug(s) with placebo was the primary objective. Studies were grouped if they evaluated the same drug(s) administered in a similar manner (*i.e.*, dosage, route of administration, and treatment duration). Given the potential effect on outcome of surgical procedure and underlying condition, timing of outcome measurement, and duration of the intervention, subgroup analyses were conducted according to these parameters. Given the diverse features of the studies included in the review, not all were necessarily represented in a meta-analysis.

Statistical analyses were conducted using Review Manager v5.3.<sup>13</sup> Dichotomous data were analyzed using Mantel–Haenszel fixed-effects model for risk ratio with 95% CI. Heterogeneity was evaluated by visual examination of forest plots and use of the  $I^2$  statistic. In cases of moderate to considerable heterogeneity (*i.e.*, 30 to 100%) the random-effects model was employed.<sup>6</sup> For studies with multiple intervention arms, we split the “shared” (placebo) group into two or more groups with smaller sample size, and included two or more (reasonably independent) comparisons.<sup>6</sup> Sensitivity analyses were conducted to evaluate robustness of a result by omitting studies considered to be outliers with respect to study quality, drug dose and duration, or pain measurement scales.

## Results

The search identified 6,709 citations, with first level screening based on title and abstract yielding 115 studies for full text review, of which 70 new studies fulfilled the inclusion criteria (fig. 1). The majority of the 45 excluded studies did not follow participants for at least 3 months ( $n = 15$ ), were not placebo controlled ( $n = 9$ ), were not double-blinded ( $n = 7$ ), were not relevant to the prevention of chronic post-surgical pain ( $n = 6$ ), or did not evaluate drugs administered systemically ( $n = 4$ ). Full details regarding the excluded studies are summarized in Supplemental Digital Content 2 (appendix B, <http://links.lww.com/ALN/C629>). Our trial database searches yielded 46 ongoing and unpublished studies. Ongoing studies are evaluating ketamine ( $n = 12$ ), pregabalin ( $n = 11$ ), IV lidocaine ( $n = 8$ ), dexamethasone ( $n = 4$ ), gabapentin ( $n = 3$ ), dexmedetomidine ( $n = 2$ ), magnesium ( $n = 2$ ), acetyl-salicylic acid ( $n = 1$ ), cannabinoids ( $n = 1$ ), clonidine ( $n = 1$ ), duloxetine ( $n = 1$ ), lamotrigine ( $n = 1$ ), meloxicam ( $n = 1$ ), midazolam ( $n = 1$ ), propranolol ( $n = 1$ ), sevoflurane ( $n = 1$ ), and tramadol-paracetamol ( $n = 1$ ). A summary of the 46 ongoing studies is included in Supplemental Digital Content 3 (appendix C, <http://links.lww.com/ALN/C630>).

## Characteristics of Included Studies

Characteristics of the 110 included studies (70 new plus 40 from the previous review)<sup>4</sup> are summarized in Table 1 and Supplemental Digital Content 4 (appendix D, <http://links.lww.com/ALN/C631>). Studies (new and from previous review) involved various surgeries including breast ( $n = 19$ ), total hip or knee arthroplasty ( $n = 16$ ), thoracotomy ( $n = 14$ ), spine ( $n = 14$ ), abdominal or pelvic ( $n = 12$ ), heart ( $n = 8$ ), limb amputation ( $n = 5$ ), thyroidectomy ( $n = 5$ ), inguinal herniorrhaphy ( $n = 4$ ), caesarean section ( $n = 3$ ), carpal tunnel ( $n = 2$ ), brain ( $n = 1$ ), mandibular fracture ( $n = 1$ ), and a combination of surgeries ( $n = 6$ ) (table 1).

Of all the new and previous studies, only 37 studies included patients that were free of pain before surgery. Patients taking various analgesics were excluded from 36

trials. Preoperative pain or analgesic use was unclear in 11 studies. Patients with preexisting pain were included in 26 studies (table 1).

Studies received financial support from research granting agencies ( $n = 28$ ), institutional and/or departmental sources ( $n = 18$ ), pharmaceutical companies ( $n = 10$ ), and granting agencies and pharmaceutical companies ( $n = 1$ ); 10 studies stated that no funding was received; and the source of funding was not reported for 43 studies (Supplemental Digital Content 4, appendix D, <http://links.lww.com/ALN/C631>). Insufficient reporting prohibits further investigation of possible correlations between sources of financial support and study outcomes and it is beyond the scope and preplanned objectives of the current review. Seventy-nine of 110 (71.8%) included studies had at least four of seven items that qualified as low risk of bias (Supplemental Digital Content 5, appendix E, <http://links.lww.com/ALN/C632>). Most studies were of small sample size having fewer than 50 participants per arm ( $n = 70$  [64%]), greater than or equal to 50 and fewer than 100 per arm ( $n = 29$  [26%]), and greater than or equal to 100 per arm ( $n = 11$  [10%]).

## Ketamine

Thirteen new studies ( $n = 1,283$  participants)<sup>14–27</sup> evaluated ketamine or (S)-ketamine (total, 27 studies;  $n = 2,757$ ).<sup>14–41</sup> Nine of 27 studies reported prevalence of any pain at 3 months,<sup>16,20,22,26,29,37,39–41</sup> 16 studies at 6 months,<sup>14–17,22,24–26,30,33–37,40,41</sup> and five studies at 12 months.<sup>14–16,28,30</sup> Prevalence of any pain at 3 months ranged from 5.6 to 72.2% (mean, 35.0%) in the placebo arm and 5.6 to 83.3% (mean, 31.5%) in the ketamine arm. No treatment effect of ketamine was observed on prevalence of any pain regardless of outcome timing, duration of drug administration, or surgical procedure (fig. 2). Forest plots for studies evaluating ketamine are included in Supplemental Digital Content 6 (appendix F, <http://links.lww.com/ALN/C633>). In 2013, subgroup analysis based on duration of treatment suggested a significant effect of ketamine compared to placebo (odds ratio, 0.37 [95% CI, 0.14 to 0.98]; two studies; 135 participants) on the prevalence of any pain at 3 months for studies evaluating ketamine treatment for more than 24 h; however, the current review did not demonstrate a similar treatment effect (risk ratio, 0.83 [95% CI, 0.58 to 1.18]; five studies; 331 participants).

Two studies reported prevalence of moderate to severe pain at 3 months (placebo: range, 14.7 to 16.7%; mean, 15.7; ketamine: range, 9.1 to 32.3%; mean 20.7),<sup>16,22</sup> six studies at 6 months (placebo: range, 0.0 to 39.1%; mean, 17.9; ketamine: range, 3.2 to 26.7%; mean, 12.2),<sup>14,16,22,33,35,37</sup> and two studies at 12 months (placebo: range, 7.1 to 26.1%; mean, 16.6; ketamine: range, 0.0 to 12.5%; mean, 6.3).<sup>14,16</sup> No treatment effect of ketamine was observed on prevalence of moderate to severe pain regardless of outcome timing, duration of drug administration, or surgical

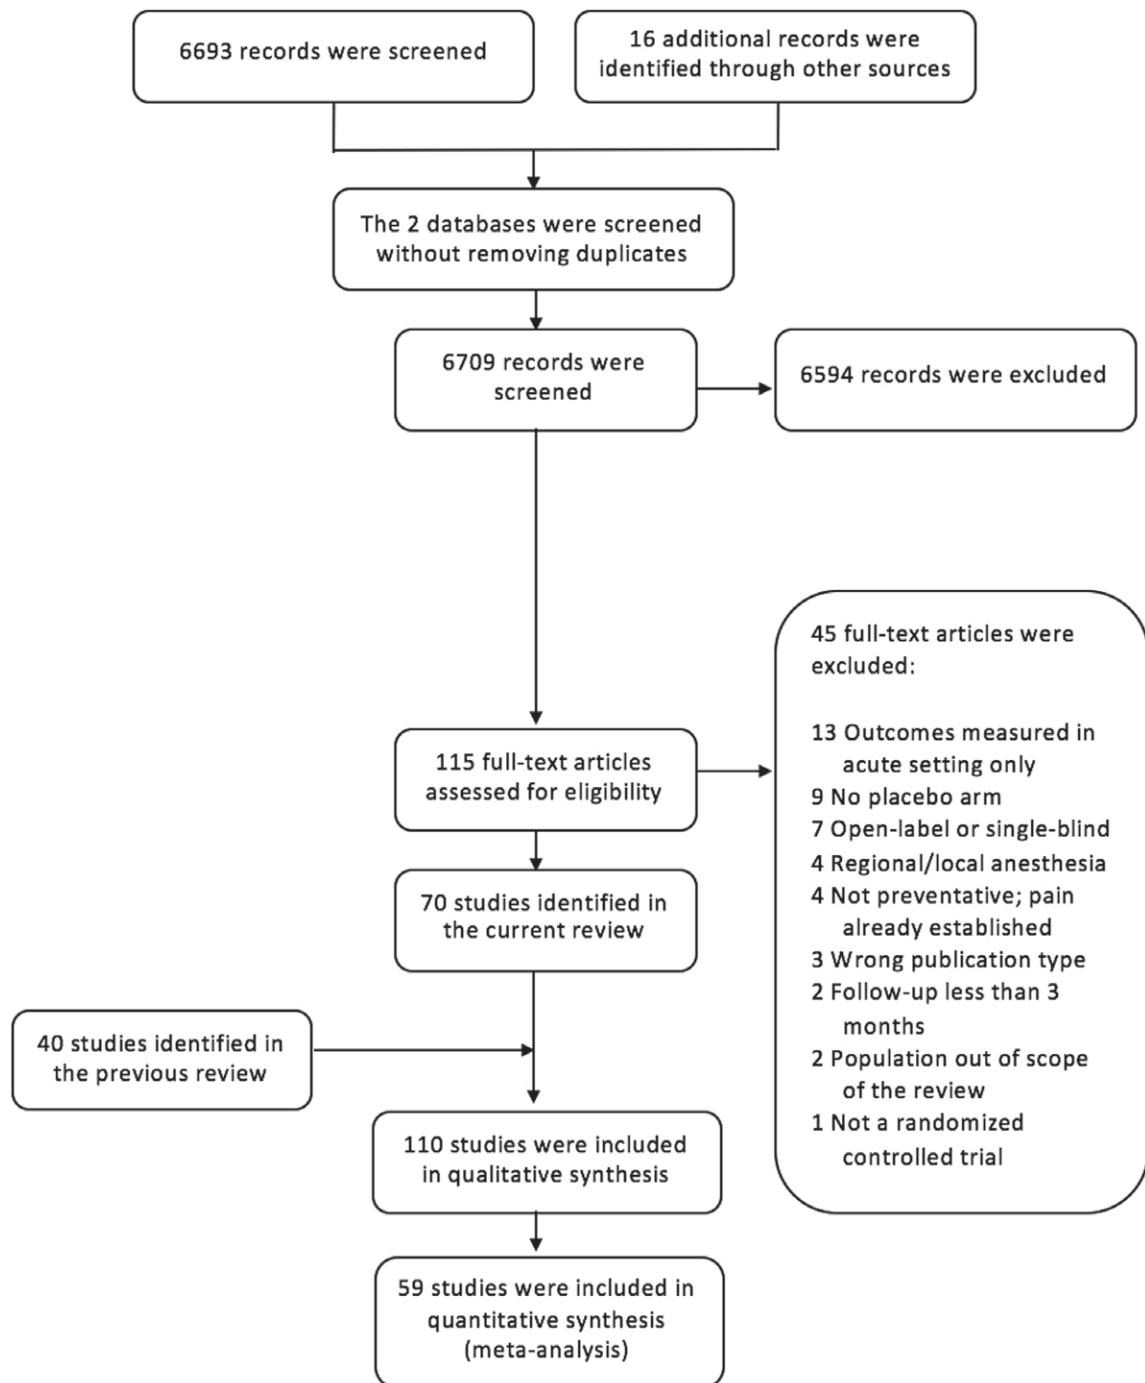

**Fig. 1.** Study flow diagram.

procedure (fig. 2). Only two of the 27 ketamine studies provided data regarding dropouts due to treatment-related adverse effects. Of those, 4 of 70 (5.7%) received ketamine and 4 of 70 (5.7%) received placebo. Adverse events included hallucinations, delayed emergence, dizziness, diplopia, and confusion.<sup>19,25</sup>

Ketamine has been evaluated in three recent reviews for orthopedic surgery,<sup>42,43</sup> and thoracotomy.<sup>44</sup> Consistent with the current review, the majority (two of three) indicated results to be inconclusive.<sup>43,44</sup> In disagreement, one narrative systematic review evaluating various interventions for adults receiving primary total knee arthroplasty concluded

**Table 1.** Characteristics of Included Studies

| Drug     | Surgery                                                | No. of Patients | Allowed Patients with Pain                                                                   | Follow-up, mo | Preoperative Dose | Intraoperative Dose                                                              | Postoperative Dose  | Cumulative Dose* | Study ID                                                    |
|----------|--------------------------------------------------------|-----------------|----------------------------------------------------------------------------------------------|---------------|-------------------|----------------------------------------------------------------------------------|---------------------|------------------|-------------------------------------------------------------|
| Ketamine | Total knee arthroplasty                                | 75              | Yes                                                                                          | 12            | 200 µg/kg         | 120 µg · kg <sup>-1</sup> · h <sup>-1</sup>                                      | 60 µg/kg for 48 h   | 3,305 µg/kg†     | Aveline <i>et al.</i> , <sup>14</sup> 2014 (new)            |
| Ketamine | Cesarean                                               | 140             | No                                                                                           | 12            | 250 µg/kg         | None                                                                             | None                | 250 µg/kg        | Bigten <i>et al.</i> , <sup>15</sup> 2012 (new)             |
| Ketamine | Breast augmentation                                    | 106             | No                                                                                           | 12            | 500 µg/kg         | None                                                                             | None                | 500 µg/kg        |                                                             |
| Ketamine | Breast augmentation                                    | 106             | No                                                                                           | 12            | 1,000 µg/kg       | None                                                                             | None                | 1,000 µg/kg      | Chaparro <i>et al.</i> , <sup>28</sup> 2010 (2013 review)   |
| Ketamine | Breast augmentation                                    | 106             | No                                                                                           | 12            | 420 µg/kg         | 200 µg · kg <sup>-1</sup> · h <sup>-1</sup>                                      | None                | 820 µg/kg†       |                                                             |
| Ketamine | Thoracotomy                                            | 77              | No                                                                                           | 12            | 100 µg/kg         | 100 µg/kg for 96 h                                                               | None                | 9,700 µg/kg      | Chumbley <i>et al.</i> , <sup>18</sup> 2019 (new)           |
| Ketamine | Breast                                                 | 36              | Long-term analgesic or anti-inflammatory treatment excluded                                  | 3             | 500 µg/kg         | 250 µg · kg <sup>-1</sup> · h <sup>-1</sup>                                      | None                | 908 µg/kg†       | Crousier <i>et al.</i> , <sup>29</sup> 2008 (2013 review)   |
| Ketamine | Major lower back                                       | 160             | Yes                                                                                          | 12            | 250 µg/kg         | 250 µg/kg for ~1 h; down to 100 µg/kg until end of postanesthesia care unit stay | None                | 900 µg/kg†       | Czarnetzki <i>et al.</i> , <sup>27</sup> 2020 (new)         |
| Ketamine | Rectal cancer                                          | 100             | Unclear                                                                                      | 12            | 250 µg/kg         | 125 µg · kg <sup>-1</sup> · h <sup>-1</sup>                                      | None                | 772 µg/kg†       | De Kock <i>et al.</i> , <sup>30</sup> 2001 (2013 review)    |
| Ketamine | Thoracotomy                                            | 86              | No                                                                                           | 4             | 500 µg/kg         | 250 µg · kg <sup>-1</sup> · h <sup>-1</sup>                                      | None                | 1,585 µg/kg†     | Duale <i>et al.</i> , <sup>31</sup> 2009 (2013 review)      |
| Ketamine | Orthopedic                                             | 120             | Taking psychoactive drugs or opiates excluded                                                | 3             | 150 µg/kg         | 1,000 µg · kg <sup>-1</sup> · h <sup>-1</sup>                                    | 1,000 µg/kg for 24h | 3,000 µg/kg†     | Dullenkopf <i>et al.</i> , <sup>32</sup> 2009 (2013 review) |
| Ketamine | Amputation                                             | 45              | Yes                                                                                          | 6             | 500 µg/kg         | None                                                                             | None                | 150 µg/kg        |                                                             |
| Ketamine | Thoracotomy                                            | 81              | Taking neuropathic pain drugs, antidepressants, anticonvulsants, NSAIDs, or opioids excluded | 6             | 500 µg/kg         | 150 µg/kg for 72 h                                                               | None                | 500 µg/kg        | Hayes <i>et al.</i> , <sup>33</sup> 2004 (2013 review)      |
| Ketamine | Thoracotomy                                            | 81              | Taking neuropathic pain drugs, antidepressants, anticonvulsants, NSAIDs, or opioids excluded | 6             | 1,000 µg/kg       | 120 µg/kg for 72 h                                                               | None                | 9,640 µg/kg      | Hu <i>et al.</i> , <sup>17</sup> 2014 (new)                 |
| Ketamine | Nephrectomy                                            | 63              | No                                                                                           | 3             | 150 µg/kg         | 100 µg · kg <sup>-1</sup> · h <sup>-1</sup>                                      | 100 µg/kg for 24 h  | 22,350 µg/kg†    | Jendoubi <i>et al.</i> , <sup>18</sup> 2017 (new)           |
| Ketamine | Thoracotomy                                            | 60              | No                                                                                           | 3             | 500 µg/kg         | 180 µg · kg <sup>-1</sup> · h <sup>-1</sup>                                      | 90 µg/kg for 48 h   | 5,356 µg/kg†     | Joseph <i>et al.</i> , <sup>19</sup> 2012 (new)             |
| Ketamine | Radical prostatectomy                                  | 160             | Chronic opioid use excluded                                                                  | 6             | 200 µg/kg         | 175 µg/kg in 70 min                                                              | None                | 375 µg/kg        | Katz <i>et al.</i> , <sup>34</sup> 2004 (2013 review)       |
| Ketamine | Thyroidectomy                                          | 64              | No                                                                                           | 3             | None              | 200+175 µg/kg in 70 min                                                          | None                | 375 µg/kg        |                                                             |
| Ketamine | Breast                                                 | 100             | Unclear                                                                                      | 6             | None              | 120 µg · kg <sup>-1</sup> · h <sup>-1</sup>                                      | None                | 472 µg/kg†       | Lee <i>et al.</i> , <sup>29</sup> 2018 (new)                |
| Ketamine | Total hip arthroplasty                                 | 142             | Taking corticosteroids or opioids excluded                                                   | 3             | 500 µg/kg         | 3 µg · kg <sup>-1</sup> · h <sup>-1</sup>                                        | None                | 2,000 µg/kg      | Malek <i>et al.</i> , <sup>35</sup> 2006 (2013 review)      |
| Ketamine | Thoracotomy                                            | 66              | Unclear                                                                                      | 6             | None              | 100 µg/kg for 60 h                                                               | None                | 506 µg/kg†       | Martinez <i>et al.</i> , <sup>21</sup> 2014 (new)           |
| Ketamine | Lumbar fusion                                          | 150             | Yes                                                                                          | 6             | 500 µg/kg         | 250 µg · kg <sup>-1</sup> · h <sup>-1</sup>                                      | None                | 6,000 µg/kg      | Mendola <i>et al.</i> , <sup>22</sup> 2012 (new)            |
| Ketamine | Total knee arthroplasty                                | 16              | Taking >10 mg morphine equivalent excluded                                                   | 6             | 500 µg/kg         | 240 µg · kg <sup>-1</sup> · h <sup>-1</sup>                                      | None                | 1,042 µg/kg†     | Nielsen <i>et al.</i> , <sup>23,24</sup> 2017; 2019 (new)   |
| Ketamine | Abdominal, thoracic, breast, or inguinal herniorrhaphy | 80              | No                                                                                           | 6             | 500 µg/kg         | 250 µg · kg <sup>-1</sup> · h <sup>-1</sup>                                      | 100 µg/kg for 24h   | 1,002 µg/kg†     | Perrin <i>et al.</i> , <sup>36</sup> 2009 (2013 review)     |
| Ketamine | Total hip arthroplasty                                 | 160             | Taking neuropathic pain drugs or >10 mg morphine equivalent excluded                         | 6             | 500 µg/kg         | 120 µg/kg for 24 h                                                               | None                | 3,588 µg/kg†     | Peyton <i>et al.</i> , <sup>25</sup> 2017 (new)             |
| Ketamine | Hysterectomy                                           | 60              | No                                                                                           | 6             | 300 µg/kg         | 50 µg · kg <sup>-1</sup> · h <sup>-1</sup>                                       | None                | 363 µg/kg†       | Sen <i>et al.</i> , <sup>38</sup> 2009 (2013 review)        |
| Ketamine | Hemorrhoidectomy                                       | 83              | Regular use of opioids excluded                                                              | 3             | 350 µg/kg         | 300 µg · kg <sup>-1</sup> · h <sup>-1</sup>                                      | None                | 452 µg/kg†       | Spreng <i>et al.</i> , <sup>39</sup> 2010 (2013 review)     |

(Continued)

Table 1. (Continued)

| Drug       | Surgery                  | No. of Patients | Allowed Patients with Pain                                                               | Follow-up, mo | Preoperative Dose | Intraoperative Dose | Postoperative Dose                     | Cumulative Dose* | Study ID                                                                    |
|------------|--------------------------|-----------------|------------------------------------------------------------------------------------------|---------------|-------------------|---------------------|----------------------------------------|------------------|-----------------------------------------------------------------------------|
| Ketamine   | Thoracotomy              | 50              | Unclear                                                                                  | 6             | None              | 50 µg/kg for 72 h   | 1.5 mg†                                | 3,600 µg/kg†     | Suzuki <i>et al.</i> , <sup>40</sup> 2006 (2013 review)                     |
| Ketamine   | Orthopedic               | 352             | Taking opioids daily for >1 week excluded                                                | 6             | None              | None                |                                        | 1,198 µg/kg§     | Sveticic <i>et al.</i> , <sup>41</sup> 2008 (2013 review)                   |
| Ketamine   | Thoracotomy              | 125             | No                                                                                       | 6             | 500 µg/kg         | None                | 250 µg/kg for 48 h                     | 12,500 µg/kg     | Tena <i>et al.</i> , <sup>26</sup> 2014 (new)                               |
| Pregabalin | Cardiac                  | 150             | No                                                                                       | 6             | 150 mg            | None                | 150 mg for 14 days                     | 2,250 mg         | Anwar <i>et al.</i> , <sup>45</sup> 2019 (new)                              |
| Pregabalin | Cardiac                  | 101             | No                                                                                       | 3             | 75 mg             | None                | None                                   | 75 mg            | Bouzia <i>et al.</i> , <sup>46</sup> 2017 (new)                             |
| Pregabalin | Thoracotomy              | 114             | No                                                                                       | 3             | 150 mg            | None                | None                                   | 150 mg           | Brulotte <i>et al.</i> , <sup>47</sup> 2015 (new)                           |
| Pregabalin | Spine                    | 40              | Yes                                                                                      | 3             | 300 mg            | None                | 300 mg for 4 days                      | 1,500 mg         | Burke <i>et al.</i> , <sup>62</sup> 2010 (2013 review)                      |
| Pregabalin | Total knee arthroplasty  | 240             | Yes                                                                                      | 6             | 300 mg            | None                | 300 mg for 1 day                       | 600 mg           | Buvanendran <i>et al.</i> , <sup>63</sup> 2010 (2013 review)                |
| Pregabalin |                          |                 |                                                                                          |               | 300 mg            | None                | 300 mg for 10 days, 150 mg for 2 days, | 3,800 mg         |                                                                             |
| Pregabalin | Spine                    | 120             | Yes                                                                                      | 6             | 150 mg            | None                | 100 mg for 2 days                      | 1,200 mg         | Choi <i>et al.</i> , <sup>48</sup> 2013 (new)                               |
| Pregabalin | Total hip arthroplasty   | 184             | Taking chronic pain medications, >10 mg morphine equivalent, or anticonvulsants excluded | 3             | 150 mg            | None                | 300 mg for 3.5 days                    | 1,500 mg         | Clarke <i>et al.</i> , <sup>64</sup> 2015 (new)                             |
| Pregabalin | Hysterectomy/ myomectomy | 80              | No                                                                                       | 3             | 450 mg            | None                | 450 mg for 5 days                      | 2,700 mg         | Fassoulaki <i>et al.</i> , <sup>49</sup> 2012 (new)                         |
| Pregabalin | Spine                    | 60              | Taking opioids, sedatives, or anticonvulsants excluded                                   | 12            | 300 mg            | None                | 300 mg for 2 days                      | 900 mg           | Gianesello <i>et al.</i> , <sup>65</sup> 2012 (2013 review)                 |
| Pregabalin | Cardiac                  | 40              | Taking anticonvulsants or antidepressants, or chronic analgesic use excluded             | 3             | 150 mg            | None                | 150 mg for 2 days                      | 450 mg           | Joshi <i>et al.</i> , <sup>50</sup> 2013 (new)                              |
| Pregabalin | Breast                   | 100             | No                                                                                       | 3             | 300 mg            | None                | 150 mg for 9 days                      | 1,650 mg         | Khan <i>et al.</i> , <sup>51</sup> 2019 (new)                               |
| Pregabalin | Spine                    | 90              | Yes                                                                                      | 3             | 75 mg             | None                | 225 mg for 7 days                      | 1,650 mg         | Khurana <i>et al.</i> , <sup>52</sup> 2014 (new)                            |
| Pregabalin | Thyroidectomy            | 99              | Taking pregabalin, gabapentin, or opioids excluded                                       | 3             | 150 mg            | None                | 150 mg for 1 day                       | 300 mg           | Kim <i>et al.</i> , <sup>66</sup> 2010 (2013 review)                        |
| Pregabalin | Thoracotomy              | 100             | No                                                                                       | 9             | 300 mg            | None                | 300 mg for 5 days                      | 1,800 mg         | Konstantatos <i>et al.</i> , <sup>53</sup> 2016 (new)                       |
| Pregabalin | Total hip arthroplasty   | 142             | Taking corticosteroids or opioids excluded                                               | 3             | 150 mg            | None                | None                                   | 150 mg           | Martinez <i>et al.</i> , <sup>21</sup> 2014 (new)                           |
| Pregabalin | Nephrectomy              | 80              | Taking analgesics or sedatives excluded                                                  | 12            | 150 mg            | None                | 450 mg for 1 day                       | 600 mg           | Myhre <i>et al.</i> , <sup>54</sup> 2017 (new)                              |
| Pregabalin | Cardiac                  | 70              | No                                                                                       | 3             | 150 mg            | None                | 150 mg for 5 days                      | 900 mg           | Pesonen <i>et al.</i> , <sup>67</sup> 2011 (2013 review)                    |
| Pregabalin | Breast                   | 200             | No                                                                                       | 6             | 75 mg             | None                | 150 mg for 7 days                      | 1,125 mg         | Reyad <i>et al.</i> , <sup>55</sup> 2019 (new)                              |
| Pregabalin | Brain tumor              | 100             | Yes                                                                                      | 3             | 300 mg            | None                | 300 mg for 3 days                      | 1,200 mg         | Shimony <i>et al.</i> , <sup>56</sup> 2016 (new)                            |
| Pregabalin | Thoracotomy              | 45              | No                                                                                       | 3             | 150 mg            | None                | 150 mg for 5 days                      | 900 mg           | Sidiropoulou <i>et al.</i> , <sup>57</sup> 2016 (new)                       |
| Pregabalin | Hysterectomy             | 501             | Unclear                                                                                  | 6             | 150 mg            | None                | 150 mg for 28 days                     | 4,350 mg         | Singla <i>et al.</i> , <sup>58</sup> 2015 Post-Hysterectomy (new)           |
| Pregabalin | Inguinal hernia repair   | 425             | Unclear                                                                                  | 6             | 300 mg            | None                | 300 mg for 28 days                     | 8,550 mg         | Singla <i>et al.</i> , <sup>59</sup> 2015 Post-inguinal hernia repair (new) |
|            |                          |                 |                                                                                          |               | 50 mg             | None                | 50 mg for 7 days                       | 400 mg           |                                                                             |
|            |                          |                 |                                                                                          |               | 150 mg            | None                | 150 mg for 7 days                      | 1,200 mg         |                                                                             |
|            |                          |                 |                                                                                          |               | 300 mg            | None                | 300 mg for 7 days                      | 2,400 mg         |                                                                             |

(Continued)

Table 1. (Continued)

| Drug       | Surgery                                                                 | No. of Patients | Allowed Patients with Pain                                                                                         | Follow-up, mo | Preoperative Dose          | Intraoperative Dose  | Postoperative Dose                                                                                                              | Cumulative Dose*                  | Study ID                                                                                                                     |
|------------|-------------------------------------------------------------------------|-----------------|--------------------------------------------------------------------------------------------------------------------|---------------|----------------------------|----------------------|---------------------------------------------------------------------------------------------------------------------------------|-----------------------------------|------------------------------------------------------------------------------------------------------------------------------|
| Pregabalin | Total knee arthroplasty                                                 | 307             | Unclear                                                                                                            | 6             | 150 mg<br>300 mg<br>150 mg | None<br>None<br>None | 150 mg for 42 days<br>300 mg for 42 days<br>150 mg for 7 days                                                                   | 6,450 mg<br>12,900 mg<br>1,200 mg | Singla <i>et al.</i> , <sup>58</sup> 2015 Post-Total knee arthroplasty (new)<br>Vig <i>et al.</i> , <sup>61</sup> 2019 (new) |
| Pregabalin | Breast                                                                  | 80              | Patients with chronic pain on analgesics or past/current use of gabapentinoids excluded                            | 3             | 100 mg<br>200 mg<br>300 mg | None<br>None<br>None | 100 mg for 14 days,<br>50 mg for 2 days<br>200 mg for 14 days,<br>100 mg for 2 days<br>300 mg for 14 days,<br>150 mg for 2 days | 1,600 mg<br>3,200 mg<br>4,800 mg  | YaDeau <i>et al.</i> , <sup>59</sup> 2015 (new)                                                                              |
| Pregabalin | Total knee arthroplasty                                                 | 120             | Chronic use of gabapentin, pregabalin, or opioids excluded                                                         | 3             | 100 mg<br>200 mg<br>300 mg | None<br>None<br>None | 100 mg for 14 days,<br>50 mg for 2 days<br>200 mg for 14 days,<br>100 mg for 2 days<br>300 mg for 14 days,<br>150 mg for 2 days | 1,600 mg<br>3,200 mg<br>4,800 mg  | YaDeau <i>et al.</i> , <sup>59</sup> 2015 (new)                                                                              |
| Pregabalin | Spine                                                                   | 105             | Use of opioids, pregabalin, or gabapentin within past 2 weeks excluded                                             | 12            | 300 mg<br>300 mg           | None<br>None         | 300 mg for 1 days<br>300 mg for 14 days                                                                                         | 600 mg<br>4,500 mg                | Zarei <i>et al.</i> , <sup>60</sup> 2016 (new)                                                                               |
| Gabapentin | Breast                                                                  | 150             | Taking antidepressants, anticonvulsants, NSAIDs, or opioids excluded                                               | 6             | 300 mg                     | None                 | 300 mg for 9 days                                                                                                               | 3,000 mg                          | Amr <i>et al.</i> , <sup>70</sup> 2010 (2013 review)                                                                         |
| Gabapentin | Thyroidectomy                                                           | 50              | No                                                                                                                 | 6             | 1,200 mg                   | None                 | None                                                                                                                            | 1,200 mg                          | Brogly <i>et al.</i> , <sup>79</sup> 2008 (2013 review)                                                                      |
| Gabapentin | Total hip arthroplasty                                                  | 126             | Taking chronic pain medications excluded                                                                           | 6             | 600 mg<br>None             | None<br>None         | None<br>600 mg                                                                                                                  | 600 mg<br>600 mg                  | Clarke <i>et al.</i> , <sup>80</sup> 2009 (2013 review)                                                                      |
| Gabapentin | Total knee arthroplasty                                                 | 179             | Taking chronic pain medications excluded                                                                           | 3             | 600 mg                     | None                 | 600 mg for 4 days                                                                                                               | 3,000 mg                          | Clarke <i>et al.</i> , <sup>71</sup> 2014 (new)                                                                              |
| Gabapentin | Breast                                                                  | 75              | Taking analgesics, sedatives, hypnotics, or antidepressants excluded                                               | 3             | 1,200 mg                   | None                 | 1,200 mg for 9 days                                                                                                             | 12,000 mg                         | Fassoulaki <i>et al.</i> , <sup>81</sup> 2002 (2013 review)                                                                  |
| Gabapentin | Thoracotomy                                                             | 104             | No                                                                                                                 | 6             | 1,200 mg                   | None                 | 600 mg for 1 day,<br>900 mg for 1 day,<br>12,000 mg for 3 days                                                                  | 6,300 mg                          | Grosen <i>et al.</i> , <sup>72</sup> 2014 (new)                                                                              |
| Gabapentin | Thoracotomy, total hip arthroplasty, total knee arthroplasty, or breast | 422             | Yes                                                                                                                | 24            | 1,200 mg                   | None                 | 1,800 mg for 3 days                                                                                                             | 6,600 mg                          | Hah <i>et al.</i> , <sup>73</sup> 2018 (new)                                                                                 |
| Gabapentin | Spine                                                                   | 90              | Yes                                                                                                                | 3             | 300 mg                     | None                 | 900 mg for 7 days                                                                                                               | 6,600 mg                          | Khurana <i>et al.</i> , <sup>52</sup> 2014 (new)                                                                             |
| Gabapentin | Thoracotomy                                                             | 146             | No                                                                                                                 | 3             | 600 mg                     | None                 | None                                                                                                                            | 600 mg                            | Kinney <i>et al.</i> , <sup>82</sup> 2011 (2013 review)                                                                      |
| Gabapentin | Total knee arthroplasty                                                 | 300             | Taking gabapentinoids, antiepileptics, anxiolytics, antidepressants, systemic glucocorticoids, or opioids excluded | 3–4 yr        | 900 mg<br>600 mg           | None<br>None         | 400 mg for 1 day,<br>1300 mg for 6 days<br>300 mg for 1 day,<br>900 mg for 6 days                                               | 9,100 mg<br>6,300 mg              | Kjaer-Petersen <i>et al.</i> , <sup>74</sup> 2018 (new)                                                                      |
| Gabapentin | Caesarean                                                               | 46              | Taking analgesics in previous week excluded                                                                        | 3             | 600 mg                     | None                 | None                                                                                                                            | 600 mg                            | Moore <i>et al.</i> , <sup>83</sup> 2011 (2013 review)                                                                       |

(Continued)

Table 1. (Continued)

| Drug                | Surgery                 | No. of Patients | Allowed Patients with Pain                 | Follow-up, mo | Preoperative Dose | Intraoperative Dose                         | Postoperative Dose                                                                                                                            | Cumulative Dose* | Study ID                                                     |
|---------------------|-------------------------|-----------------|--------------------------------------------|---------------|-------------------|---------------------------------------------|-----------------------------------------------------------------------------------------------------------------------------------------------|------------------|--------------------------------------------------------------|
| Gabapentin          | Amputation              | 46              | Yes                                        | 6             | None              | None                                        | 300 mg for 1 day, 900 mg for 3 days, 1,200 mg for 2 days, 1,500 mg for 2 days, 1,800 mg for 2 days, 2,100 mg for 2 days, 2,400 mg for 18 days | 75,600 mg        | Nikolajsen <i>et al.</i> , <sup>84</sup> 2006 (2013 review)  |
| Gabapentin          | Inguinal hernia repair  | 100             | Yes                                        | 24            | 300 mg            | None                                        | 600 mg for 1 day, 900 mg for 1 day                                                                                                            | 1,800 mg         | Quail <i>et al.</i> , <sup>75</sup> 2017 (new)               |
| Gabapentin          | Carpal tunnel           | 40              | Yes                                        | 6             | 600 mg            | None                                        | None                                                                                                                                          | 600 mg           | Sadatsume <i>et al.</i> , <sup>76</sup> 2016 (new)           |
| Gabapentin          | Hysterectomy            | 60              | No                                         | 6             | 1,200 mg          | None                                        | None                                                                                                                                          | 1,200 mg         | Sen <i>et al.</i> , <sup>85</sup> 2009a (2013 review)        |
| Gabapentin          | Inguinal herniorrhaphy  | 60              | Unclear                                    | 6             | 1,200 mg          | None                                        | None                                                                                                                                          | 1,200 mg         | Sen <i>et al.</i> , <sup>85</sup> 2009 (2013 review)         |
| Gabapentin          | Cesarean                | 132             | No                                         | 3             | 600 mg            | None                                        | None                                                                                                                                          | 600 mg           | Short <i>et al.</i> , <sup>77</sup> 2012 (new)               |
| Gabapentin          | Cardiac                 | 40              | Taking analgesics excluded                 | 6             | 1,200 mg          | None                                        | 1,200 mg for 2 days                                                                                                                           | 3,600 mg         | Ucak <i>et al.</i> , <sup>86</sup> 2011 (2013 review)        |
| IV lidocaine        | Colectomy               | 95              | No                                         | 6             | 60 mg             | 60 mg/h for 48 h                            | None                                                                                                                                          | 43.2 mg/kg†      | Beaussier <i>et al.</i> , <sup>80</sup> 2018 (new)           |
| IV lidocaine        | Thyroidectomy           | 90              | No                                         | 3             | 2 mg/kg           | 3 mg · kg <sup>-1</sup> · h <sup>-1</sup>   | None                                                                                                                                          | 9.4 mg/kg†       | Choi <i>et al.</i> , <sup>91</sup> 2017 (new)                |
| IV lidocaine        | Breast                  | 36              | No                                         | 3             | 1.5 mg/kg         | 1.5 mg · kg <sup>-1</sup> · h <sup>-1</sup> | 1.5 mg/kg for 1 h                                                                                                                             | 4.5 mg/kg†       | Grigoras <i>et al.</i> , <sup>87</sup> 2012 (2013 review)    |
| IV lidocaine        | Spine                   | 44              | Chronic opioid use excluded                | 3             | 2 mg/kg           | 3 mg · kg <sup>-1</sup> · h <sup>-1</sup>   | None                                                                                                                                          | 7.4 mg/kg†       | Ibrahim <i>et al.</i> , <sup>92</sup> 2018 (new)             |
| IV lidocaine        | Nephrectomy             | 63              | No                                         | 3             | 1.5 mg/kg         | 1 mg · kg <sup>-1</sup> · h <sup>-1</sup>   | 1 mg/kg for 24 h                                                                                                                              | 27.8 mg/kg†      | Jendoubi <i>et al.</i> , <sup>19</sup> 2017 (new)            |
| IV lidocaine        | Breast                  | 150             | No                                         | 6             | 1.5 mg/kg         | 2 mg · kg <sup>-1</sup> · h <sup>-1</sup>   | None                                                                                                                                          | 8.1 mg/kg†       | Kendall <i>et al.</i> , <sup>93</sup> 2018 (new)             |
| IV lidocaine        | Breast                  | 100             | No                                         | 3             | 1.5 mg/kg         | 2 mg · kg <sup>-1</sup> · h <sup>-1</sup>   | None                                                                                                                                          | 5.1 mg/kg†       | Khan <i>et al.</i> , <sup>51</sup> 2019 (new)                |
| IV lidocaine        | Breast                  | 126             | No                                         | 3             | 2 mg/kg           | 2 mg · kg <sup>-1</sup> · h <sup>-1</sup>   | None                                                                                                                                          | 6.3 mg/kg†       | Kim <i>et al.</i> , <sup>84</sup> 2017 (new)                 |
| IV lidocaine        | Total hip arthroplasty  | 60              | Taking corticosteroids or opioids excluded | 3             | 1.5 mg/kg         | 1.5 mg · kg <sup>-1</sup> · h <sup>-1</sup> | 1.5 mg/kg for 1 h                                                                                                                             | 6.8 mg/kg†       | Martin <i>et al.</i> , <sup>95</sup> 2008 (new)              |
| IV lidocaine        | Breast                  | 80              | No                                         | 6             | 1.5 mg/kg         | 2 mg · kg <sup>-1</sup> · h <sup>-1</sup>   | 2 mg/kg for 2 h                                                                                                                               | 11.1 mg/kg†      | Terkawi <i>et al.</i> , <sup>96</sup> 2015 (new)             |
| Parecoxib           | Thoracotomy             | 86              | No                                         | 12            | 40 mg             | None                                        | 80 mg for 2.5 days                                                                                                                            | 240 mg           | Ling <i>et al.</i> , <sup>103</sup> 2016 (new)               |
| Parecoxib           | Breast augmentation     | 219             | Chronic analgesic use excluded             | 12            | 40 mg             | None                                        | None                                                                                                                                          | 40 mg            | Romundstad <i>et al.</i> , <sup>107</sup> 2006 (2013 review) |
| Ibuprofen           | Total hip arthroplasty  | 902             | Taking NSAIDs within 48 h excluded         | 6–12          | None              | None                                        | 1,200 mg for 14 days                                                                                                                          | 16,800 mg        | Fransen <i>et al.</i> , <sup>105</sup> 2006 (2013 review)    |
| Ibuprofen           | Breast                  | 30              | Chronic use of aspirin or NSAIDs excluded  | 6             | 400 mg            | None                                        | 1,600 mg for 2 days                                                                                                                           | 2,000 mg         | Lakdja <i>et al.</i> , <sup>106</sup> 1997 (2013 review)     |
| Celecoxib           | Total knee arthroplasty | 107             | Taking narcotics daily excluded            | 12            | None              | None                                        | 400 mg for 42 days                                                                                                                            | 16,800 mg        | Schroer <i>et al.</i> , <sup>100</sup> 2011 (new)            |
| Dexketoprofen       | Thoracotomy             | 60              | Unclear                                    | 6             | 50 mg             | None                                        | 50 mg                                                                                                                                         | 100 mg           | Comez <i>et al.</i> , <sup>101</sup> 2015 (new)              |
| Flurbiprofen axetil | Breast                  | 60              | No                                         | 12            | 50 mg             | None                                        | 50 mg                                                                                                                                         | 100 mg           | Sun <i>et al.</i> , <sup>102</sup> 2013 (new)                |
| Parecoxib           | Breast                  | 138             | No                                         | 12            | 40 mg             | None                                        | 40 mg                                                                                                                                         | 80 mg            | van Helmond <i>et al.</i> , <sup>104</sup> 2016 (new)        |
| Celecoxib           | Breast                  | 138             | No                                         | 12            | 40 mg             | None                                        | 200 mg for 5 days                                                                                                                             | 1,000 mg         | Bergeron <i>et al.</i> , <sup>112</sup> 2009 (2013 review)   |
| Dexamethasone       | Total hip arthroplasty  | 50              | Yes                                        | 12            | 40 mg             | None                                        | None                                                                                                                                          | 40 mg            | (Continued)                                                  |

Downloaded from <http://arj.sagepub.com/journalPermissions.nav> at National Institute of Health - NIH on April 19, 2024



Table 1. (Continued)

| Drug               | Surgery                 | No. of Patients | Allowed Patients with Pain                                           | Follow-up, mo | Preoperative Dose                                       | Intraoperative Dose                                 | Postoperative Dose                                    | Cumulative Dose* | Study ID                                                      |
|--------------------|-------------------------|-----------------|----------------------------------------------------------------------|---------------|---------------------------------------------------------|-----------------------------------------------------|-------------------------------------------------------|------------------|---------------------------------------------------------------|
| Dexamethasone      | Spine                   | 160             | Taking steroids or strong opioids excluded                           | 12            | 16 mg                                                   | None                                                | None                                                  | 16 mg            | Nielsen <i>et al.</i> , <sup>108,110</sup> 2015; 2016 (new)   |
| Dexamethasone      | Spine                   | 112             | Yes                                                                  | 24            | 0.2 mg/kg                                               | None                                                | 4 doses of 0.06 mg/kg                                 | 0.44 mg/kg       | Jeyamohan <i>et al.</i> , <sup>108</sup> 2015 (new)           |
| Hydrocortisone     | Cardiac                 | 36              | Unclear                                                              | 6             | 100 mg                                                  | 240 mg for 1 day, 120 mg for 1 day, 30 mg for 1 day | 240 mg for 1 day, 60 mg for 1 day                     | 550 mg           | Weis <i>et al.</i> , <sup>113</sup> 2006 (2013 review)        |
| Methylprednisolone | Breast augmentation     | 219             | Chronic analgesic use excluded                                       | 12            | 125 mg                                                  | None                                                | None                                                  | 125 mg           | Romundstad <i>et al.</i> , <sup>107</sup> 2006 (2013 review)  |
| Methylprednisolone | Cardiac                 | 1,043           | Yes                                                                  | 6             | 500 mg                                                  | None                                                | None                                                  | 500 mg           | Turan <i>et al.</i> , <sup>111</sup> 2015 (new)               |
| Acetaminophen      | Hysterectomy            | 140             | No                                                                   | 3             | None                                                    | None                                                | 4,000 mg for 3 days                                   | 12,000 mg        | Koyuncu <i>et al.</i> , <sup>114</sup> 2018 (new)             |
| Acetaminophen      | Cardiac                 | 150             | No                                                                   | 3             | None                                                    | None                                                | 4,000 mg for 1 day                                    | 4,000 mg         | Turan <i>et al.</i> , <sup>115</sup> 2017 (new)               |
| Amantadine         | Breast                  | 22              | No                                                                   | 6             | 200 mg                                                  | None                                                | 200 mg for 13 days                                    | 2,800 mg         | Eisenberg <i>et al.</i> , <sup>116</sup> 2007 (2013 review)   |
| Amantadine         | Mandibular fracture     | 60              | Opioid use or dependency excluded                                    | 6             | 100 mg                                                  | None                                                | None                                                  | 100 mg           | Yazdani <i>et al.</i> , <sup>117</sup> 2016 (new)             |
| Dexmedetomidine    | Hysterectomy            | 80              | No                                                                   | 12            | 0.5 µg · kg <sup>-1</sup> · h <sup>-1</sup>             | None                                                | N/A                                                   | 0.70 µg/kg       | Han <i>et al.</i> , <sup>118</sup> 2019 (new)                 |
| Dextromethorphan   | Hysterectomy            | 50              | No                                                                   | 3             | 750 mg                                                  | None                                                | None                                                  | 750 mg           | Ilkjaer <i>et al.</i> , <sup>119</sup> 2000 (2013 review)     |
| Duloxetine         | Spine                   | 101             | Yes                                                                  | 3             | 30 mg for 5 days, 60 mg for 9 days                      | None                                                | 60 mg for 81 days                                     | 5,550 mg         | Hyer <i>et al.</i> , <sup>120</sup> 2015 (new)                |
| Duloxetine         | Total knee arthroplasty | 106             | Chronic use of gabapentin, pregabalin, or opioids excluded           | 3             | 60 mg                                                   | None                                                | 60 mg for 14 days                                     | 900 mg           | YaDeau <i>et al.</i> , <sup>121</sup> 2016 (new)              |
| Etanercept         | Inguinal herniorrhaphy  | 77              | Yes                                                                  | 12            | 50 mg                                                   | None                                                | None                                                  | 50 mg            | Cohen <i>et al.</i> , <sup>122</sup> 2013 (new)               |
| Fentanyl           | Amputation              | 65              | Yes                                                                  | 6             | 58.3 µg/h                                               | 54.5 µg/h for 2 days                                | None                                                  | Variable         | Karanikolas <i>et al.</i> , <sup>123</sup> 2011 (2013 review) |
| Magnesium          | Breast                  | 126             | No                                                                   | 3             | 20 mg/kg + 20 mg · kg <sup>-1</sup> · h <sup>-1</sup>   | None                                                | 63.2 mg/kg                                            | Intraoperative   | Kim <i>et al.</i> , <sup>94</sup> 2017 (new)                  |
| Mevastine          | Amputation              | 19              | Yes                                                                  | 12            | None                                                    | None                                                | 10 mg for 7 days, 20 mg for 7 days, 30 mg for 14 days | 630 mg           | Schley <i>et al.</i> , <sup>124</sup> 2007 (2013 review)      |
| Mexiletine         | Breast                  | 100             | Taking analgesics, sedatives, or antidepressants excluded            | 3             | 200 mg                                                  | None                                                | 400 mg for 6 days                                     | 2,600 mg         | Fassoulaki <i>et al.</i> , <sup>125</sup> 2001 (2013 review)  |
| Mexiletine         | Breast                  | 75              | Taking analgesics, sedatives, hypnotics, or antidepressants excluded | 3             | 200 mg                                                  | None                                                | 600 mg for 10 days                                    | 6,200 mg         | Fassoulaki <i>et al.</i> , <sup>81</sup> 2002 (2013 review)   |
| Minocycline        | Carpal Tunnel           | 131             | Yes                                                                  | 12            | 200 mg                                                  | None                                                | 200 mg for 5 days                                     | 1,200 mg         | Curtin <i>et al.</i> , <sup>127</sup> 2017 (new)              |
| Minocycline        | Spine                   | 100             | Yes                                                                  | 3             | 200 mg                                                  | None                                                | 200 mg for 8 days                                     | 1,800 mg         | Martinez <i>et al.</i> , <sup>126</sup> 2013 (new)            |
| Nefopam            | Total knee arthroplasty | 75              | Yes                                                                  | 12            | 0.2 mg/kg                                               | 120 µg · kg <sup>-1</sup> · h <sup>-1</sup>         | 60 µg · kg <sup>-1</sup> · h <sup>-1</sup> for 2 days | 3,128 µg/kg      | Aveline <i>et al.</i> , <sup>14</sup> 2014 (new)              |
| Nefopam            | Thyroidectomy           | 58              | Chronic use of opioids or any analgesic drugs >2 weeks excluded      | 3             | 0.2 mg/kg + 120 µg · kg <sup>-1</sup> · h <sup>-1</sup> | None                                                | None                                                  | 520 µg/kg        | Kim <i>et al.</i> , <sup>130</sup> 2018 (new)                 |
| Nefopam            | Breast                  | 94              | Taking any kind of analgesic excluded                                | 3             | 20 mg                                                   | None                                                | None                                                  | 20 mg            | Na <i>et al.</i> , <sup>128</sup> 2016 (new)                  |

(Continued)

Table 1. (Continued)

| Drug          | Surgery        | No. of Patients | Allowed Patients with Pain                                        | Follow-up, mo | Preoperative Dose  | Intraoperative Dose | Postoperative Dose       | Cumulative Dose* | Study ID                                               |
|---------------|----------------|-----------------|-------------------------------------------------------------------|---------------|--------------------|---------------------|--------------------------|------------------|--------------------------------------------------------|
| Nitrous oxide | Numerous       | 2,050           | Unclear                                                           | 54            | Intraoperative 70% | None                | None                     | Intraoperative   | Chan <i>et al.</i> , <sup>132</sup> 2011 (2013 review) |
| Nitrous oxide | Numerous       | 3,325           | Yes                                                               | 12            | Intraoperative 70% | None                | None                     | Intraoperative   | Chan <i>et al.</i> , <sup>131</sup> 2016 (new)         |
| Valproic acid | Amputation     | 128             | Yes                                                               | 3             | 250 mg             | None                | 750 mg for 3.7 days      | 2,775 mg         | Buchheit <i>et al.</i> , <sup>133</sup> 2019 (new)     |
| Venlafaxine   | Breast surgery | 150             | Taking antidepressants, anticonvulsants, NSAIDs, opioids excluded | 6             | 37.5 mg            | None                | 37.5 mg for 9 days       | 375 mg           | Amr <i>et al.</i> , <sup>78</sup> 2010 (2013 review)   |
| Vitamin C     | Spinal fusion  | 123             | Yes                                                               | 12            | None               | Not reported        | Not reported for 45 days | Not reported     | Lee <i>et al.</i> , <sup>134</sup> 2017 (new)          |

\*Cumulative doses have been estimated for comparative purposes only. †Calculation based on reported anesthesia duration. ‡1.5 mg of ketamine per each patient-controlled analgesia opioid bolus. §Calculation based on ketamine consumption and timing of administration. ||Duration of hospital stay postsurgery estimated at 2 days. IV, intravenous; NSAID, nonsteroidal anti-inflammatory drug.

a treatment effect of ketamine claiming “good-quality evidence for a small benefit”<sup>42</sup>; however, their conclusion was based on one small randomized controlled trial.<sup>14</sup>

### Pregabalin

Twenty-one new studies (n = 3,184)<sup>21,45–61</sup> evaluated pregabalin (total, 26 studies; n = 3,693).<sup>21,45–67</sup> Nineteen of 26 studies reported prevalence of any pain at 3 months,<sup>21,45,47–51,53,57,58,61–63,65–67</sup> six studies at 6 months,<sup>45,48,54,58,63</sup> and two studies at 12 months.<sup>54,65</sup> Prevalence of any pain at 3 months ranged from 3.1 to 80.0% (mean, 39.5%) in the placebo arm and 3.7 to 88.0% (mean, 31.9%) in the pregabalin arm. Subgroup analyses resulted in a statistically significant treatment effect of pregabalin 3 months after cardiac surgery (three trials; risk ratio, 0.25 [95% CI, 0.13 to 0.50]), and 3 months after total knee arthroplasty (three trials; risk ratio, 0.75 [95% CI, 0.58 to 0.97]). No treatment effects were observed for any pain evaluated at 3, 6, or 12 months when drug administration was for 24 h or less or more than 24 h or for other types of surgical procedures (fig. 3). Forest plots for studies evaluating pregabalin are included in Supplemental Digital Content 7 (appendix G, <http://links.lww.com/ALN/C634>). In 2013, only one study evaluated the prevalence of any pain at 6 months therefore no subgroup analyses were performed; in the current review, six studies were included in meta-analysis and did not demonstrate a treatment effect of pregabalin when drugs were administered for more than 24 h (risk ratio, 0.78 [95% CI, 0.47 to 1.28]).

Nine studies reported prevalence of moderate to severe pain at 3 months (placebo: range, 4.2 to 34.0%; mean, 20.2; pregabalin: range, 0.0 to 20.0%; mean, 8.7),<sup>45,47,48,51,53,57,59,61,63</sup> and three studies at 6 months (placebo: range, 11.3 to 28.0%; mean, 17.9; pregabalin: range, 2.7 to 8.8%; mean, 5.8).<sup>45,48,63</sup> When pregabalin was administered for more than 24 h the overall effectiveness risk ratio showed a statistically significant treatment effect of pregabalin compared to placebo at 3 months (nine trials; risk ratio, 0.47 [95% CI, 0.33 to 0.68]), and 6 months (three trials; risk ratio, 0.29 [95% CI, 0.14 to 0.58]) for varying surgical procedures, and 3 months after total knee arthroplasty (two trials; risk ratio, 0.42 [95% CI, 0.22 to 0.81]) (fig. 3). Only eleven of the 26 pregabalin studies provided data regarding dropouts due to treatment-related adverse effects. Of those, 56 of 1,295 (4.3%) received pregabalin and 27 of 819 (3.3%) received placebo. Adverse events included dizziness, nausea, vomiting, sedation, diplopia, somnolence, visual disturbances, fainting, fatigue, constipation, and allergic reaction.<sup>45,47,49,56–58,62–64</sup>

Pregabalin has been evaluated in four recent reviews for orthopedic surgery,<sup>42</sup> thoracotomy,<sup>68</sup> breast cancer surgery,<sup>69</sup> and various surgeries.<sup>70</sup> Consistent with the current review, half (two of four) of these reviews did not have sufficient evidence to make a clear recommendation.<sup>69,70</sup> Two reviews concluded a treatment effect of pregabalin. One narrative systematic review evaluating various

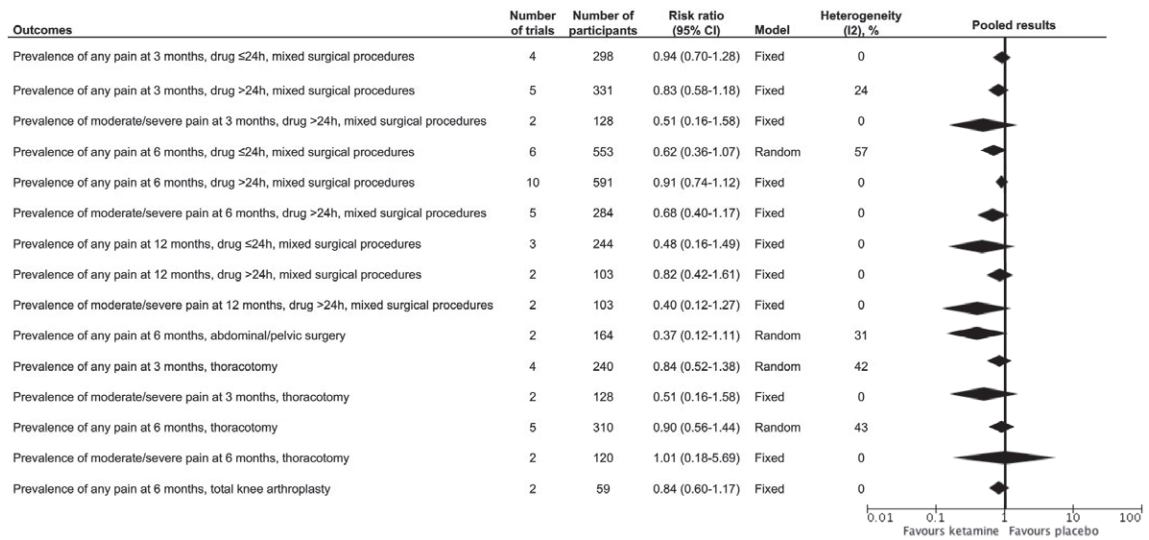

**Fig. 2.** Summary of ketamine meta-analyses. Data are presented as the pooled results for each outcome. Drug ≤ 24 h indicates drugs were administered for 24 h or less; drug > 24 h indicates drugs were administered for longer than 24 h.

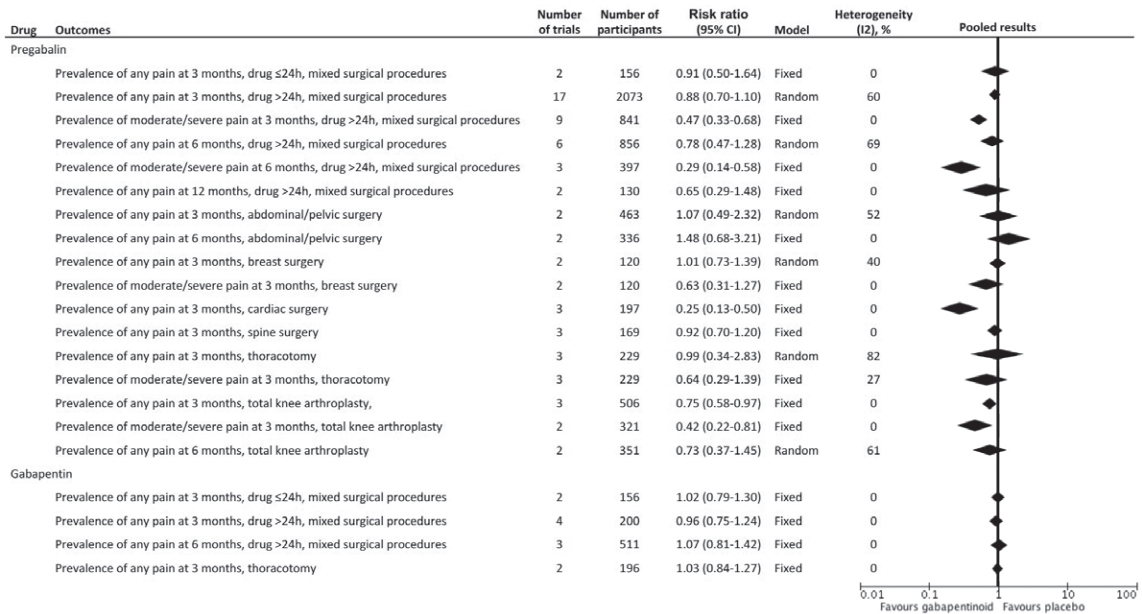

**Fig. 3.** Summary of gabapentinoid meta-analyses. Data are presented as the pooled results for each outcome. Drug ≤ 24 h indicates drugs were administered for 24 h or less; drug > 24 h indicates drugs were administered for longer than 24 h.

interventions for total knee arthroplasty<sup>42</sup> was limited to one randomized controlled trial from 2010<sup>63</sup> and the other review included nine studies for thoracotomy, seven of which were excluded from the present review due to lack of blinding, not placebo controlled, and lack of long term pain assessment.<sup>68</sup> Furthermore, two of the nine studies

that were included in our review did not find a reduction in the prevalence of postsurgical chronic pain.<sup>47,53</sup> Despite the high proportion of studies lacking data on adverse events, consistent with our review adverse events included sedation,<sup>42,70</sup> dizziness,<sup>68,70</sup> drowsiness,<sup>68,69</sup> and visual disturbances.<sup>70</sup>

## Gabapentin

Eight new studies ( $n = 1,367$ )<sup>52,71–77</sup> evaluated gabapentin (total, 18 studies;  $n = 2,166$ ).<sup>38,52,71–86</sup> Six of 18 studies reported prevalence of any pain at 3 months,<sup>72,81–84,86</sup> four studies at 6 months,<sup>72,73,80,84</sup> and one study at 12 months.<sup>73</sup> Prevalence of any pain at 3 months ranged from 20.0 to 66.7% (mean, 49.9%) in the placebo arm and 12.5 to 70.2% (mean, 47.8%) in the gabapentin arm. No treatment effects were observed for any pain evaluated at 3 or 6 months (fig. 3). Forest plots for studies evaluating gabapentin are included in Supplemental Digital Content 8 (appendix H, <http://links.lww.com/ALN/C635>). Consistent with the 2013 review, meta-analyses of studies evaluating gabapentin failed to demonstrate statistical significance upon comparison to placebo at three or six months.

Two studies reported prevalence of moderate to severe pain at 3 and 6 months,<sup>72,76</sup> however results were not pooled given heterogeneity of timing and duration of administration. When drug administration was for 24 h or less, the prevalence of moderate to severe pain at 3 months was 21.1% in the placebo group and 22.2% in the gabapentin group and 10.5% and 16.7% at 6 months, respectively.<sup>76</sup> When drug administration was for more than 24h, the prevalence of moderate to severe pain at 3 months was 13.5% in the placebo group and 12.8% in the gabapentin group and 8.1% and 16.7% at 6 months, respectively.<sup>72</sup> Only five of the 18 gabapentin studies provided data regarding dropouts due to treatment-related adverse effects. Of those, 32 of 506 (6.3%) received gabapentin and 18 of 401 (4.5%) received placebo. Adverse events included severe sedation, dizziness, nausea, syncope, paresthesia of the legs, and elevated serum creatinine.<sup>72–74,83,84</sup>

Gabapentin has been evaluated in two recent reviews for breast cancer surgery.<sup>69,87</sup> One review concluded low- to very-low-quality evidence that preoperative use of gabapentin does not reduce the rate of chronic postsurgical pain.<sup>69</sup> One review concluded that “preoperative use of gabapentin was able to reduce acute and chronic postoperative pain.”<sup>87</sup> However, seven of nine studies were excluded from the current review; six due to follow-up for less than 3 months (range, 12h to 1 month), and one was a clinical trial with one arm that combined topical analgesia and gabapentin. It is unclear why two of five studies were included in their meta-analysis evaluating chronic pain given their short timeline for follow-up (*i.e.*, 24h and 7 days).<sup>88,89</sup> Furthermore, it is unclear why two studies included in the meta-analysis by Jiang *et al.*<sup>87</sup> show a treatment effect of gabapentin: Amr *et al.*<sup>78</sup> did not report dichotomous results for the incidence of chronic pain and concluded “gabapentin had no effect on chronic pain,” and Fassoulaki *et al.*<sup>81</sup> reported no difference in the proportion of chronic pain between gabapentin 12 of 22 (54.5%) and pregabalin 14 of 24 (58.3%).

## IV Lidocaine

Nine new studies ( $n = 808$ )<sup>18,51,90–96</sup> evaluated IV lidocaine (total, 10 studies;  $n = 844$ ).<sup>18,51,90–97</sup> Six of 10 studies reported

prevalence of any pain at 3 months,<sup>51,90,91,93,94,97</sup> three studies at 6 months,<sup>90,93,96</sup> and no studies at 12 months. Prevalence of any pain at 3 months ranged from 17.4 to 79.2% (mean, 41.6%) in the placebo arm and 11.8 to 92.3% (mean, 32.7%) in the IV lidocaine arm. One study could not be pooled in meta-analysis due to duration of drug administration for more than 24 h during colectomy.<sup>90</sup> Subgroup analyses of prevalence of any pain at 6 months based on duration of treatment being 24 h or less showed a statistically significant treatment effect of IV lidocaine after breast surgery (two trials; risk ratio, 0.43 [95% CI, 0.23 to 0.80]). No treatment effect of IV lidocaine was observed at 3 months after breast surgery or when the drug was administered for 24 h or less (fig. 4). Forest plots for studies evaluating IV lidocaine are included in Supplemental Digital Content 9 (appendix I, <http://links.lww.com/ALN/C636>).

Two studies reported prevalence of moderate to severe pain at 3 months (placebo: range, 10.0 to 20.8%; mean, 15.4; IV lidocaine: range, 4.7 to 7.7%; mean, 6.2),<sup>51,93</sup> and two studies at 6 months (placebo: range, 3.4 to 22.2%; mean, 12.8; IV lidocaine: range, 3.2 to 8.8%; mean, 6.0).<sup>93,96</sup> No treatment effect of IV lidocaine was observed for this outcome regardless of timing of outcome measurement or surgical procedure (fig. 4). Only 1 of the 10 IV lidocaine studies provided data regarding dropouts due to treatment-related adverse effects. Of those, 1 of 22 (4.5%) received IV lidocaine and 0 of 22 (0.0%) received placebo. One patient in the IV lidocaine group developed convulsions during injection of the loading dose.<sup>92</sup>

Intravenous lidocaine has been evaluated in two recent reviews for breast cancer surgery,<sup>98</sup> and various surgeries.<sup>99</sup> Both reviews were cautiously optimistic in support of IV lidocaine for preventing chronic postsurgical pain. However, higher quality evidence from large, definitive, multicenter clinical trials was called for before a widespread change in practice could be justified.<sup>99</sup>

## Nonsteroidal Anti-inflammatory Drugs

Five new studies ( $n = 451$ ) evaluated nonsteroidal anti-inflammatory drugs (NSAID) including one celecoxib,<sup>100</sup> one dexketoprofen,<sup>101</sup> one flurbiprofen axetil,<sup>102</sup> one parecoxib,<sup>103</sup> and one IV parecoxib in combination with oral celecoxib<sup>104</sup> (total, eight studies;  $n = 1,602$ ).<sup>100–107</sup> Two of eight studies reported prevalence of any pain at 3 months,<sup>103,104</sup> three studies at 6 months,<sup>102,104,106</sup> and four studies at 12 months.<sup>102–104,107</sup> Prevalence of any pain at 3 months ranged from 48.8 to 59.1% (mean, 53.9%) in the placebo arm and 22.5 to 54.3% (mean, 38.4%) in the NSAID arm. Subgroup analysis did not show an effect of NSAIDs compared to placebo for studies evaluating treatment for more than 24h at 3, 6, and 12 months; however, a statistically significant treatment effect was observed at 12 months when drugs were administered for 24 h or less (fig. 5). Forest plots for studies evaluating NSAIDs are included in Supplemental Digital Content 10 (appendix J, <http://links.lww.com/ALN/C637>).

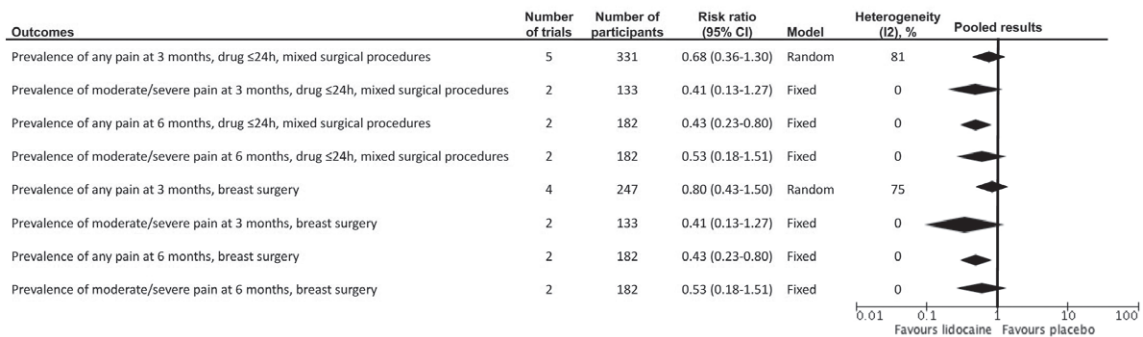

**Fig. 4.** Summary of intravenous lidocaine meta-analyses. Data are presented as the pooled results for each outcome. Drug ≤ 24 h indicates drugs were administered for 24 h or less; drug > 24 h indicates drugs were administered for longer than 24 h.

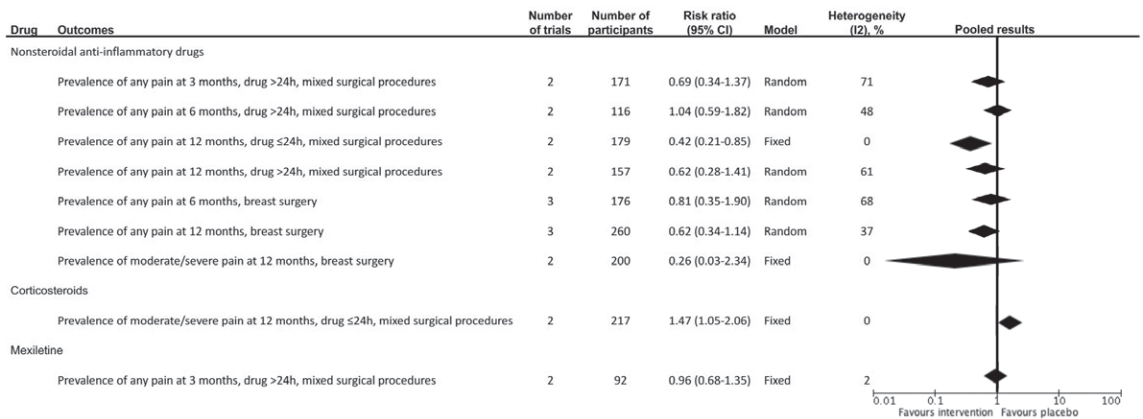

**Fig. 5.** Summary of other drugs meta-analyses. Data are presented as the pooled results for each outcome. Drug ≤ 24 h indicates drugs were administered for 24 h or less; drug > 24 h indicates drugs were administered for longer than 24 h.

One study reported prevalence of moderate to severe pain at 3 and 6 months and concluded no treatment effect of COX-2 inhibitors on persistent pain.<sup>104</sup> Two studies reported prevalence of moderate to severe pain at 12 months; however, results were not pooled due to heterogeneity of timing and duration of NSAID administration. When drug administration was for 24 h or less,<sup>107</sup> the prevalence of moderate to severe pain at 12 months was 3.2% in the placebo group and 0.0% in the NSAID group *versus* 2.4% *versus* 0.0%, respectively, when drug administration was for more than 24h.<sup>104</sup> Only one of the eight NSAID studies provided data regarding dropouts due to treatment-related adverse effects. Of those, 51 of 440 (11.6%) received ibuprofen and 37 of 435 (8.5%) received placebo.<sup>105</sup>

### Corticosteroids

Three new studies (n = 1,315) evaluated corticosteroids: two dexamethasone<sup>108-110</sup> and one methylprednisolone<sup>111</sup> (total, six studies; n = 1,620).<sup>107-113</sup> One of six studies reported

prevalence of any pain at 3 months,<sup>110</sup> one at 6 months,<sup>111</sup> and one at 12 months.<sup>107</sup> Results were not pooled due to heterogeneity of the timing of outcome measurement.

Two of six studies reported the prevalence of moderate to severe pain at 12 months (placebo: range, 3.2 to 50.0%; mean, 26.6; corticosteroid: range, 5.4 to 72.7%; mean, 39.0).<sup>107,109</sup> Subgroup analysis at 12 months based on duration of treatment for 24 h or less resulted in a statistically significant treatment effect of placebo (two trials; risk ratio, 1.47 [95% CI, 1.05 to 2.06]) (fig. 5). Forest plots for studies evaluating corticosteroids are included in Supplemental Digital Content 11 (appendix K, <http://links.lww.com/ALN/C638>). No studies evaluating corticosteroids provided data regarding dropouts due to treatment-related adverse effects.

### Other Drugs

Fewer studies evaluated acetaminophen (two new; n = 290),<sup>114,115</sup> amantadine (two studies, one new; n = 82),<sup>116,117</sup>

dexmedetomidine (one new;  $n = 80$ ),<sup>118</sup> dextromethorphan (one study, not new;  $n = 50$ ),<sup>119</sup> duloxetine (two new;  $n = 207$ ),<sup>120,121</sup> etanercept (one new;  $n = 77$ ),<sup>122</sup> fentanyl (one study, not new;  $n = 65$ ),<sup>123</sup> magnesium (one new;  $n = 126$ ),<sup>94</sup> memantine (one study, not new;  $n = 19$ ),<sup>124</sup> mexiletine (two studies, not new;  $n = 175$ ),<sup>81,125</sup> minocycline (two new;  $n = 231$ ),<sup>126,127</sup> nefopam (four new;  $n = 307$ ),<sup>14,128–130</sup> nitrous oxide (two studies, one new;  $n = 5,375$ ),<sup>131,132</sup> valproic acid (one new;  $n = 128$ ),<sup>133</sup> venlafaxine (one study, not new;  $n = 150$ ),<sup>78</sup> and vitamin C (one new;  $n = 123$ ).<sup>134</sup> Primary and secondary outcomes for drugs evaluated in fewer than five studies were inconclusive and shown in Supplemental Digital Content 12 (appendix L, <http://links.lww.com/ALN/C639>).

## Discussion

This update reports on an escalating number of randomized controlled trials evaluating perioperative systemic drugs for the prevention of chronic postsurgical pain. The previous review in 2013 included 40 studies and the current one adds 70 new studies in just the last 6 yr. Most studies evaluated drugs that are used to treat acute postoperative pain—namely, ketamine, pregabalin, gabapentin, IV lidocaine, and NSAIDs. Overall, meta-analyses of available studies demonstrated superiority over placebo in 0 of 15 ketamine meta-analyses, 5 of 17 pregabalin meta-analyses, 0 of 4 gabapentin meta-analyses, 2 of 8 IV lidocaine meta-analyses, and 1 of 7 NSAID meta-analyses. Treatment-related adverse effects resulting in study dropouts were reported in only 2 of 27 ketamine studies, 11 of 26 pregabalin studies, 5 of 18 gabapentin studies, 1 of 10 IV lidocaine studies, 1 of 8 NSAID studies, and 0 of 6 corticosteroid studies. Insufficient reporting on the potential harms of each of the pharmacologic interventions was an impediment to conducting quantitative assessments to weigh the benefit–risk trade-offs.

The 110 included studies were of reasonably good quality with mostly low risks of bias related to randomization and blinding. Frequent risks of bias were related to small sample size (fewer than 50 participants).<sup>11,135</sup> Studies which were insufficiently blinded or uncontrolled were excluded as shown in the “Characteristics of Excluded Studies” table (Supplemental Digital Content 2, appendix B, <http://links.lww.com/ALN/C629>).

The studies included in this review varied with respect to pharmacologic interventions (*i.e.*, 28 different drugs and 16 drug classes); dosage, timing, and duration of drug administration; surgical procedures; participants (*e.g.*, with and without preoperative pain); sample size; outcome measurement tools; and timing of pain assessment (*e.g.*, 3, 6, and/or 12 months). These disparities restrict the amount of data that can be pooled in meta-analysis which presents major challenges in interpretation and applicability of the results. Therefore, caution is advised when generalizing the results

beyond the boundaries of the subanalyses conducted in this review. This review should be considered in the setting of several potential limitations. Although 110 randomized controlled trials were included, only 59 studies allowed for direct comparisons in quantitative synthesis. Others were excluded due to variation in drugs evaluated, surgical procedures, pain assessment tools, and timing of pain outcome measurement. Although restriction of this review to double-blind, randomized controlled trials limits the potential for some sources of bias, the relatively small size of most of the studies (*i.e.*, 90% with fewer than 100 participants per arm), and high levels of withdrawals in some studies contribute other sources of bias that potentially overestimate treatment effect. Also, chronic pain was not necessarily the primary outcome for all included studies. Measures of pain at 3 or more months after surgery may have been secondary outcomes which may be a source of selective reporting bias. Furthermore, detailed assessment of pain and its consequences were often not reported beyond “Yes/No” since only a limited number of studies reported relevant moderate/severe pain. However, we believe all available results be considered for inclusion. The heterogeneity with respect to surgical procedures (*i.e.*, nerve *vs.* other tissue damage), participant populations (preexisting chronic pain, opioid use, and psychiatric morbidities), diverse underlying sources of pain after surgery (*e.g.*, incisional, nerve transection/injury, lymphedema, and deep tissue, among others, occurring after breast cancer surgery), and treatment dose/duration limit interpretation. This includes the question of whether the surgery was done to treat a pain condition, or otherwise, has not been addressed sufficiently in the literature. Other limitations come from heterogeneity regarding the study intervention (*e.g.*, drug dose [small/large], timing with respect to surgery [pre-, intra-, postoperative], and insufficient numbers of trials in each of these categories to conduct relevant subgroup analyses). Although this review did not reveal strong or consistent treatment effects for preventing chronic postsurgical pain, the observation of some statistically significant results points to the concern of multiplicity in systematic reviews where several different meta-analyses are conducted.<sup>136</sup> Although the Cochrane Collaboration<sup>6</sup> and other investigators do not generally recommend adjusting for multiple comparisons and is not generally done in meta-analyses—which seek to estimate intervention effects rather than test for them—this is still an area for future investigation.<sup>136</sup> Finally, lack of access to data from studies that remain unpublished may be an important source of publication bias to consider.

However, strengths of this review should be acknowledged: (1) this is the most up-to-date review of pharmacotherapy for prevention of chronic postsurgical pain with trials published as recently as 2019; (2) we conducted a comprehensive search for eligible randomized controlled trials in any language; (3) procedures throughout the review were conducted in a way that was rigorous,

transparent, and replicable; (4) this review follows definitive standard reporting criteria according to the Cochrane Collaboration,<sup>6</sup> Preferred Reporting Items for Systematic Reviews and Meta-analysis,<sup>7</sup> and A Measurement Tool to Assess Systematic Reviews<sup>8</sup>; (5) this is the only known systematic review in the past 5 yr that has considered all perioperative systemic drugs and was not limited by surgical procedure; (6) we reviewed a number of therapeutic agents in the same systematic manner; and (7) we used subgroup analyses according to dose/duration of treatment, surgical procedure, and timing of outcome measurements.

There is a need for better designed, large-scale, high-quality studies with adequate power to detect treatment effects of pharmacologic interventions on chronic pain outcomes 3 or more months after surgery, and focus on patient safety by reporting consistent and reliable data on withdrawals due to treatment-related adverse events. Conducting further trials of gabapentinoids for chronic pain prevention should take into consideration their apparent lack of effect for acute postoperative pain,<sup>137</sup> and the diminishing likelihood of effectiveness for preventing chronic postoperative pain. Researchers should consider using detailed standardized outcome measurement tools (e.g., pain intensity on a 0 to 10 numerical rating scale) that can be summarized using dichotomous outcomes (e.g., any pain [more than 0 out of 10] and moderate to severe pain [greater than or equal to 4 of 10]) assessed at multiple and consistent time points (e.g., 3, 6, and 12 months) postsurgery, along with the specific relation of pain to the operated area, and consider stratification of those with and without preoperative pain and analgesic use, as well as implementing better characterization of surgical procedure (nerve damage) and patient characteristics (high pain responders) where appropriate. Studies should focus on drug dosage and duration within the context of the procedure-specific acute pain trajectory in question. There may be little value to repeat studies on single-shot or short-term drug interventions for this multifactorial problem, with a continuous inflammatory response lasting for several days (or weeks). Finally, considering use of the drugs included in this review to prevent chronic postsurgical pain—in light of their apparently uncertain effectiveness—also requires consideration of their safety in the perioperative setting. Given the potential adverse effects of some of these drugs (e.g., COX-2 inhibitors,<sup>138</sup> gabapentinoids<sup>139</sup>), it should be noted that safety assessment and reporting in perioperative clinical trials is sometimes inadequate.<sup>140,141</sup> Therefore, any future research in this area should incorporate more thorough and comprehensive safety assessment and reporting.

## Conclusions

Consistent with our original review, and supported by nearly triple the number of studies, this review suggests again the need for larger-scale, high-quality studies to confirm or

refute the effectiveness and safety of pharmacologic interventions for the prevention of chronic postsurgical pain. Based on currently available evidence, none of the drugs studied so far can be recommended for clinical use specifically for the indication of preventing chronic pain after surgery.

## Acknowledgments

The authors wish to thank Joanne Abbott, M.Sc., Cochrane Collaboration, Oxford, United Kingdom, and Amanda Ross-White, B.A., M.L.I.S., Queen's University Library, Kingston, Ontario, Canada, for their valuable assistance with searching the literature.

## Research Support

This review was supported, in part, by the Canadian Institutes of Health Research Strategy for Patient-oriented Research Chronic Pain Network (Hamilton, Ontario, Canada).

## Competing Interests

The authors declare no competing interests.

## Correspondence

Address correspondence to Dr. Gilron: Victory 2 Pavilion, Department of Anesthesiology and Perioperative Medicine, Kingston General Hospital, 76 Stuart Street, Kingston, Ontario, Canada K7L2V7. gilroni@queensu.ca. This article may be accessed for personal use at no charge through the Journal Web site, [www.anesthesiology.org](http://www.anesthesiology.org).

## References

1. Kehlet H, Jensen TS, Woolf CJ: Persistent postsurgical pain: Risk factors and prevention. *Lancet* 2006; 367:1618–25
2. Macrae WA: Chronic post-surgical pain: 10 years on. *Br J Anaesth* 2008; 101:77–86
3. Macrae WA, Davies HT: Chronic postsurgical pain, *Epidemiology of Pain*. Edited by Crombie IK, Croft PR, Linton SJ, LeResche L, Von Korff M. Seattle, IASP Press, 1999, pp 125–142
4. Chaparro LE, Smith SA, Moore RA, Wiffen PJ, Gilron I: Pharmacotherapy for the prevention of chronic pain after surgery in adults. *Cochrane Database Syst Rev* 2013;7:CD008307
5. Gilron I, Moore RA, Wiffen PJ, McQuay HJ: Pharmacotherapy for the prevention of chronic pain after surgery in adults. *Cochrane Database Syst Rev* 2010;1:CD008307.
6. *Cochrane Handbook for Systematic Reviews of Interventions* Version 5.1.0 [updated March 2011]. Edited by Higgins JPT, Green S. The Cochrane Collaboration, 2011

7. Moher D, Liberati A, Tetzlaff J, Altman DG; PRISMA Group: Preferred reporting items for systematic reviews and meta-analyses: The PRISMA statement. *PLoS Med* 2009; 6:e1000097
8. Shea BJ, Reeves BC, Wells G, Thuku M, Hamel C, Moran J, Moher D, Tugwell P, Welch V, Kristjansson E, Henry DA: AMSTAR 2: A critical appraisal tool for systematic reviews that include randomised or non-randomised studies of healthcare interventions, or both. *BMJ* 2017; 358:j4008
9. Higgins JP, Altman DG, Gøtzsche PC, Jüni P, Moher D, Oxman AD, Savovic J, Schulz KF, Weeks L, Sterne JA; Cochrane Bias Methods Group; Cochrane Statistical Methods Group: The Cochrane Collaboration's tool for assessing risk of bias in randomised trials. *BMJ* 2011; 343:d5928
10. Bhandari M, Haynes RB: How to appraise the effectiveness of treatment. *World J Surg* 2005; 29:570–5
11. Moore AR, Gavaghan D, Tramèr RM, Collins LS, McQuay JH: Size is everything—large amounts of information are needed to overcome random effects in estimating direction and magnitude of treatment effects. *Pain* 1998; 78:209–16
12. Gewandter JS, Dworkin RH, Turk DC, Farrar JT, Fillingim RB, Gilron I, Markman JD, Oaklander AL, Polydefkis MJ, Raja SN, Robinson JP, Woolf CJ, Ziegler D, Ashburn MA, Burke LB, Cowan P, George SZ, Goli V, Graff OX, Iyengar S, Jay GW, Katz J, Kehlet H, Kitt RA, Kopecky EA, Malamut R, McDermott MP, Palmer P, Rappaport BA, Rauschkolb C, Steigerwald I, Tobias J, Walco GA: Research design considerations for chronic pain prevention clinical trials: IMMPACT recommendations. *Pain* 2015; 156:1184–97
13. Review Manager (RevMan) [computer program]. Version 5.3. Copenhagen: The Nordic Cochrane Centre, The Cochrane Collaboration; 2014
14. Aveline C, Roux AL, Hetet HL, Gautier JF, Vautier P, Cognet F, Bonnet F: Pain and recovery after total knee arthroplasty: a 12-month follow-up after a prospective randomized study evaluating Nefopam and Ketamine for early rehabilitation. *Clin J Pain* 2014; 30:749–54
15. Bilgen S, Köner O, Türe H, Menda F, Fiçicioğlu C, Aykaç B: Effect of three different doses of ketamine prior to general anaesthesia on postoperative pain following Caesarean delivery: A prospective randomized study. *Minerva Anesthesiol* 2012; 78:442–9
16. Chumbley GM, Thompson L, Swatman JE, Urch C: Ketamine infusion for 96 hr after thoracotomy: Effects on acute and persistent pain. *Eur J Pain* 2019; 23:985–93
17. Hu J, Liao Q, Zhang F, Tong J, Ouyang W: Chronic post-thoracotomy pain and perioperative ketamine infusion. *J Pain Palliat Care Pharmacother* 2014; 28:117–21
18. Jendoubi A, Naceur IB, Bouzouita A, Trifa M, Ghedira S, Chebil M, Houissa M: A comparison between intravenous lidocaine and ketamine on acute and chronic pain after open nephrectomy: A prospective, double-blind, randomized, placebo-controlled study. *Saudi J Anaesth* 2017; 11:177–84
19. Joseph C, Gaillat F, Duponq R, Lieven R, Baumstarck K, Thomas P, Penot-Ragon C, Kerbaul F: Is there any benefit to adding intravenous ketamine to patient-controlled epidural analgesia after thoracic surgery? A randomized double-blind study. *Eur J Cardiothorac Surg* 2012; 42:e58–65
20. Lee J, Park HP, Jeong MH, Son JD, Kim HC: Efficacy of ketamine for postoperative pain following robotic thyroidectomy: A prospective randomised study. *J Int Med Res* 2018; 46:1109–20
21. Martinez V, Cymerman A, Ben Ammar S, Fiaud JF, Rapon C, Poindessous F, Judet T, Chauvin M, Bouhassira D, Sessler D, Mazoit X, Fletcher D: The analgesic efficiency of combined pregabalin and ketamine for total hip arthroplasty: A randomised, double-blind, controlled study. *Anaesthesia* 2014; 69:46–52
22. Mendola C, Cammarota G, Netto R, Cecci G, Pisterna A, Ferrante D, Casadio C, Della Corte F: S(+)-ketamine for control of perioperative pain and prevention of post thoracotomy pain syndrome: A randomized, double-blind study. *Minerva Anesthesiol* 2012; 78:757–66
23. Nielsen RV, Fomsgaard JS, Nikolajsen L, Dahl JB, Mathiesen O: Intraoperative S-ketamine for the reduction of opioid consumption and pain one year after spine surgery: A randomized clinical trial of opioid-dependent patients. *Eur J Pain* 2019; 23:455–60
24. Nielsen RV, Fomsgaard JS, Siegel H, Martusevicius R, Nikolajsen L, Dahl JB, Mathiesen O: Intraoperative ketamine reduces immediate postoperative opioid consumption after spinal fusion surgery in chronic pain patients with opioid dependency: A randomized, blinded trial. *Pain* 2017; 158:463–70
25. Peyton PJ, Wu C, Jacobson T, Hogg M, Zia F, Leslie K: The effect of a perioperative ketamine infusion on the incidence of chronic postsurgical pain—a pilot study. *Anaesth Intensive Care* 2017; 45:459–65
26. Tena B, Gomar C, Rios J: Perioperative epidural or intravenous ketamine does not improve the effectiveness of thoracic epidural analgesia for acute and chronic pain after thoracotomy. *Clin J Pain* 2014; 30:490–500
27. Czarnetzki C, Desmeules J, Tessitore E, Faundez A, Chabert J, Daali Y, Fournier R, Dupuis-Lozeron E, Cedraschi C, Richard Tramèr M: Perioperative intravenous low-dose ketamine for neuropathic pain after major lower back surgery: A randomized, placebo-controlled study. *Eur J Pain* 2020; 24:555–67
28. Chaparro LE, Munoz Y, Gallo CA, Alvarez HA, Restrepo SM, Perez N, Restrepo L: Pain and sensory symptoms following augmentation mammoplasty: A long term follow-up study with intraoperative ketamine use [Dolor y síntomas sensoriales después de



- mamoplastia estética de aumento: Un estudio de seguimiento a largo plazo posterior al uso intraoperatorio de ketamina]. *Revista Colombiana Anestesiología* 2010; 38:204–12
29. Crousier M, Cognet V, Khaled M, Gueugniaud PY, Piriou V: [Effect of ketamine on prevention of post-mastectomy chronic pain. A pilot study]. *Ann Fr Anesth Reanim* 2008; 27:987–93
  30. De Kock M, Lavand'homme P, Waterloos H: 'Balanced analgesia' in the perioperative period: Is there a place for ketamine? *Pain* 2001; 92:373–80
  31. Dualé C, Sibaud F, Guastella V, Vallet L, Gimbert YA, Taheri H, Filaire M, Schoeffler P, Dubray C: Perioperative ketamine does not prevent chronic pain after thoracotomy. *Eur J Pain* 2009; 13:497–505
  32. Dullenkopf A, Müller R, Dillmann F, Wiedemeier P, Hegi TR, Gautschi S: An intraoperative pre-incision single dose of intravenous ketamine does not have an effect on postoperative analgesic requirements under clinical conditions. *Anaesth Intensive Care* 2009; 37:753–7
  33. Hayes C, Armstrong-Brown A, Burstal R: Perioperative intravenous ketamine infusion for the prevention of persistent post-amputation pain: A randomized, controlled trial. *Anaesth Intensive Care* 2004; 32:330–8
  34. Katz J, Schmid R, Snijselaar DG, Coderre TJ, McCartney CJL, Wowk A: Pre-emptive analgesia using intravenous fentanyl plus low-dose ketamine for radical prostatectomy under general anesthesia does not produce short-term or long-term reductions in pain or analgesic use. *Pain* 2004; 110:707–18
  35. Malek J, Kurzova A, Bendova M, Noskova P, Strunova M, Vedral T: The prospective study on the effect of a preemptive long-term postoperative administration of a low-dose ketamine on the incidence of chronic postmastectomy pain. [Efekt perioperacniho podavani ketaminu na potlaceni vzniku chronicke bolesti po operaci prsu –prospektivni studie]. *Anesteziologie a Intenzivni Medicina* 2006; 17:34–7
  36. Perrin SB, Purcell AN: Intraoperative ketamine may influence persistent pain following knee arthroplasty under combined general and spinal anaesthesia: A pilot study. *Anaesth Intensive Care* 2009; 37:248–53
  37. Remérand F, Le Tendre C, Baud A, Couvret C, Pourrat X, Favard L, Laffon M, Fusciardi J: The early and delayed analgesic effects of ketamine after total hip arthroplasty: A prospective, randomized, controlled, double-blind study. *Anesth Analg* 2009; 109:1963–71
  38. Sen H, Sizlan A, Yanarates O, Emirkadi H, Ozkan S, Dagli G, Turan A: A comparison of gabapentin and ketamine in acute and chronic pain after hysterectomy. *Anesth Analg* 2009; 109:1645–50
  39. Spreng UJ, Dahl V, Ræder J: Effects of perioperative S (+) ketamine infusion added to multimodal analgesia in patients undergoing ambulatory haemorrhoidectomy. *Scand J Pain* 2010; 1:100–5
  40. Suzuki M, Haraguti S, Sugimoto K, Kikutani T, Shimada Y, Sakamoto A: Low-dose intravenous ketamine potentiates epidural analgesia after thoracotomy. *ANESTHESIOLOGY* 2006; 105:111–9
  41. Svetcic G, Farzanegan F, Zmoos P, Zmoos S, Eichenberger U, Curatolo M: Is the combination of morphine with ketamine better than morphine alone for postoperative intravenous patient-controlled analgesia? *Anesth Analg* 2008; 106:287–93
  42. Beswick AD, Dennis J, Gooberman-Hill R, Blom AW, Wyld V: Are perioperative interventions effective in preventing chronic pain after primary total knee replacement? A systematic review. *BMJ Open* 2019; 9:e028093
  43. Riddell JM, Trummel JM, Onakpoya IJ: Low-dose ketamine in painful orthopaedic surgery: A systematic review and meta-analysis. *Br J Anaesth* 2019; 123:325–34
  44. Moyses DW, Kaye AD, Diaz JH, Qadri MY, Lindsay D, Pyati S: Perioperative ketamine administration for thoracotomy pain. *Pain Physician* 2017; 20:173–84
  45. Anwar S, Cooper J, Rahman J, Sharma C, Langford R: Prolonged perioperative use of pregabalin and ketamine to prevent persistent pain after cardiac surgery. *ANESTHESIOLOGY* 2019; 131:119–31
  46. Bouzia A, Tassoudis V, Karanikolas M, Vretzakis G, Petsiti A, Tsilimingas N, Arnaoutoglou E: Pregabalin effect on acute and chronic pain after cardiac surgery. *Anesthesiol Res Pract* 2017; 2017:2753962
  47. Brulotte V, Ruel MM, Lafontaine E, Chouinard P, Girard F: Impact of pregabalin on the occurrence of postthoracotomy pain syndrome: A randomized trial. *Reg Anesth Pain Med* 2015; 40:262–9
  48. Choi YS, Shim JK, Song JW, Kim JC, Yoo YC, Kwak YL: Combination of pregabalin and dexamethasone for postoperative pain and functional outcome in patients undergoing lumbar spinal surgery: A randomized placebo-controlled trial. *Clin J Pain* 2013; 29:9–14
  49. Fassoulaki A, Melemenis A, Tsaroucha A, Paraskeva A: Perioperative pregabalin for acute and chronic pain after abdominal hysterectomy or myomectomy: A randomised controlled trial. *Eur J Anaesthesiol* 2012; 29:531–6
  50. Joshi SS, Jagadeesh AM: Efficacy of perioperative pregabalin in acute and chronic post-operative pain after off-pump coronary artery bypass surgery: A randomized, double-blind placebo controlled trial. *Ann Card Anaesth* 2013; 16:180–5
  51. Khan JS, Hodgson N, Choi S, Reid S, Paul JE, Hong NJL, Holloway C, Busse JW, Gilron I, Buckley DN, McGillion M, Clarke H, Katz J, Mackey S, Avram R, Pohl K, Rao-Melacini P, Devereaux PJ: Perioperative pregabalin and intraoperative lidocaine infusion to reduce persistent neuropathic pain after breast cancer surgery: A multicenter, factorial, randomized, controlled pilot trial. *J Pain* 2019; 20:980–93

52. Khurana G, Jindal P, Sharma JP, Bansal KK: Postoperative pain and long-term functional outcome after administration of gabapentin and pregabalin in patients undergoing spinal surgery. *Spine (Phila Pa 1976)* 2014; 39:E363–8
53. Konstantatos AH, Howard W, Story D, Mok LY, Boyd D, Chan MT: A randomised controlled trial of peri-operative pregabalin vs. placebo for video-assisted thoracoscopic surgery. *Anaesthesia* 2016; 71:192–7
54. Myhre M, Romundstad L, Stubhaug A: Pregabalin reduces opioid consumption and hyperalgesia but not pain intensity after laparoscopic donor nephrectomy. *Acta Anaesthesiol Scand* 2017; 61:1314–24
55. Reyad RM, Omran AF, Abbas DN, Kamel MA, Shaker EH, Tharwat J, Reyad EM, Hashem T: The possible preventive role of pregabalin in postmastectomy pain syndrome: A double-blinded randomized controlled trial. *J Pain Symptom Manage* 2019; 57:1–9
56. Shimony N, Amit U, Minz B, Grossman R, Dany MA, Gonen L, Kandov K, Ram Z, Weinbroum AA: Perioperative pregabalin for reducing pain, analgesic consumption, and anxiety and enhancing sleep quality in elective neurosurgical patients: A prospective, randomized, double-blind, and controlled clinical study. *J Neurosurg* 2016; 125:1513–22
57. Sidiropoulou T, Giavasopoulos E, Kostopanagiotou G, Vafeiadou M, Lioulias A, Stamatakis E, Matsota P: Perioperative pregabalin for postoperative pain relief after thoracotomy. *Journal of Anesthesia and Surgery* 2016; 3:106–11
58. Singla NK, Chelly JE, Lionberger DR, Gimbel J, Sanin L, Sporn J, Yang R, Cheung R, Knapp L, Parsons B: Pregabalin for the treatment of postoperative pain: Results from three controlled trials using different surgical models. *J Pain Res* 2015; 8:9–20
59. YaDeau JT, Lin Y, Mayman DJ, Goytizolo EA, Alexiades MM, Padgett DE, Kahn RL, Jules-Elysee KM, Ranawat AS, Bhagat DD, Fields KG, Goon AK, Curren J, Westrich GH: Pregabalin and pain after total knee arthroplasty: A double-blind, randomized, placebo-controlled, multi-dose trial. *Br J Anaesth* 2015; 115:285–93
60. Zarei M, Najafi A, Mansouri P, Sadeghi-Yazdankhah S, Saberi H, Moradi M, Farzan M: Management of post-operative pain after lumbar surgery—pregabalin for one day and 14 days—A randomized, triple-blinded, placebo-controlled study. *Clin Neurol Neurosurg* 2016; 151:37–42
61. Vig S, Kumar V, Deo S, Bhan S, Mishra S, Bhatnagar S: Effect of perioperative pregabalin on incidence of chronic postmastectomy pain syndrome: A prospective randomized placebo-controlled pilot study. *Indian J Palliat Care* 2019; 25:508–13
62. Burke SM, Shorten GD: Perioperative pregabalin improves pain and functional outcomes 3 months after lumbar discectomy. *Anesth Analg* 2010; 110:1180–5
63. Buvanendran A, Kroin JS, DellaValle CJ, Kari M, Moric M, Tuman KJ: Perioperative oral pregabalin reduces chronic pain after total knee arthroplasty: A prospective, randomized, controlled trial. *Anesth Analg* 2010; 110:199–207
64. Clarke H, Pagé GM, McCartney CJ, Huang A, Stratford P, Andrión J, Kennedy D, Awad IT, Gollish J, Kay J, Katz J: Pregabalin reduces postoperative opioid consumption and pain for 1 week after hospital discharge, but does not affect function at 6 weeks or 3 months after total hip arthroplasty. *Br J Anaesth* 2015; 115:903–11
65. Giancesello L, Pavoni V, Barboni E, Galeotti I, Nella A: Perioperative pregabalin for postoperative pain control and quality of life after major spinal surgery. *J Neurosurg Anesthesiol* 2012; 24:121–6
66. Kim SY, Jeong JJ, Chung WY, Kim HJ, Nam KH, Shim YH: Perioperative administration of pregabalin for pain after robot-assisted endoscopic thyroidectomy: A randomized clinical trial. *Surg Endosc* 2010; 24:2776–81
67. Pesonen A, Suojaranta-Ylinen R, Hammarén E, Kontinen VK, Raivio P, Tarkkila P, Rosenberg PH: Pregabalin has an opioid-sparing effect in elderly patients after cardiac surgery: A randomized placebo-controlled trial. *Br J Anaesth* 2011; 106:873–81
68. Yu Y, Liu N, Zeng Q, Duan J, Bao Q, Lei M, Zhao J, Xie J: The efficacy of pregabalin for the management of acute and chronic postoperative pain in thoracotomy: A meta-analysis with trial sequential analysis of randomized-controlled trials. *J Pain Res* 2019; 12:159–70
69. Rai AS, Khan JS, Dhaliwal J, Busse JW, Choi S, Devereaux PJ, Clarke H: Preoperative pregabalin or gabapentin for acute and chronic postoperative pain among patients undergoing breast cancer surgery: A systematic review and meta-analysis of randomized controlled trials. *J Plast Reconstr Aesthet Surg* 2017; 70:1317–28
70. Martinez V, Pichard X, Fletcher D: Perioperative pregabalin administration does not prevent chronic postoperative pain: Systematic review with a meta-analysis of randomized trials. *Pain* 2017; 158:775–83
71. Clarke HA, Katz J, McCartney CJ, Stratford P, Kennedy D, Pagé MG, Awad IT, Gollish J, Kay J: Perioperative gabapentin reduces 24 h opioid consumption and improves in-hospital rehabilitation but not post-discharge outcomes after total knee arthroplasty with peripheral nerve block. *Br J Anaesth* 2014; 113:855–64
72. Grosen K, Drewes AM, Højsgaard A, Pfeiffer-Jensen M, Hjortdal VE, Pilegaard HK: Perioperative gabapentin for the prevention of persistent pain after thoracotomy: A randomized controlled trial. *Eur J Cardiothorac Surg* 2014; 46:76–85
73. Hah J, Mackey SC, Schmidt P, McCue R, Humphreys K, Trafton J, Efron B, Clay D, Sharifzadeh Y, Ruchelli G, Goodman S, Huddleston J, Maloney WJ, Dirbas FM, Shrager J, Costouros JG, Curtin C, Carroll I: Effect of perioperative gabapentin on postoperative pain

- resolution and opioid cessation in a mixed surgical cohort: A randomized clinical trial. *JAMA Surg* 2018; 153:303–11
74. Kjær Petersen K, Lunn TH, Husted H, Hansen LT, Simonsen O, Laursen MB, Kehlet H, Arendt-Nielsen L: The influence of pre- and perioperative administration of gabapentin on pain 3–4 years after total knee arthroplasty. *Scand J Pain* 2018; 18:237–45
  75. Quail J, Spence D, Hannon M: Perioperative gabapentin improves patient-centered outcomes after inguinal hernia repair. *Mil Med* 2017; 182:e2052–5
  76. Sadatsune EJ, Leal Pda C, Cossetti RJ, Sakata RK: Effect of preoperative gabapentin on pain intensity and development of chronic pain after carpal tunnel syndrome surgical treatment in women: Randomized, double-blind, placebo-controlled study. *Sao Paulo Med J* 2016; 134:285–91
  77. Short J, Downey K, Bernstein P, Shah V, Carvalho JC: A single preoperative dose of gabapentin does not improve postcesarean delivery pain management: A randomized, double-blind, placebo-controlled dose-finding trial. *Anesth Analg* 2012; 115:1336–42
  78. Amr YM, Yousef AA: Evaluation of efficacy of the perioperative administration of venlafaxine or gabapentin on acute and chronic postmastectomy pain. *Clin J Pain* 2010; 26:381–5
  79. Brogly N, Wattier JM, Andrieu G, Peres D, Robin E, Kipnis E, Arnalsteen L, Thielemans B, Carnaille B, Pattou F, Vallet B, Lebuffe G: Gabapentin attenuates late but not early postoperative pain after thyroidectomy with superficial cervical plexus block. *Anesth Analg* 2008; 107:1720–5
  80. Clarke H, Pereira S, Kennedy D, Andriou J, Mitsakakis N, Gollish J, Katz J, Kay J: Adding gabapentin to a multimodal regimen does not reduce acute pain, opioid consumption or chronic pain after total hip arthroplasty. *Acta Anaesthesiol Scand* 2009; 53:1073–83
  81. Fassoulaki A, Patris K, Sarantopoulos C, Hogan Q: The analgesic effect of gabapentin and mexiletine after breast surgery for cancer. *Anesth Analg* 2002; 95:985–91
  82. Kinney MA, Mantilla CB, Carns PE, Passe MA, Brown MJ, Hooten WM, Curry TB, Long TR, Wass CT, Wilson PR, Weingarten TN, Huntoon MA, Rho RH, Mauck WD, Pulido JN, Allen MS, Cassivi SD, Deschamps C, Nichols FC, Shen KR, Wigle DA, Hoehn SL, Alexander SL, Hanson AC, Schroeder DR: Preoperative gabapentin for acute post-thoracotomy analgesia: A randomized, double-blinded, active placebo-controlled study. *Pain Pract* 2012; 12:175–83
  83. Moore A, Costello J, Wiczorek P, Shah V, Taddio A, Carvalho JC: Gabapentin improves postcesarean delivery pain management: A randomized, placebo-controlled trial. *Anesth Analg* 2011; 112:167–73
  84. Nikolajsen L, Finnerup NB, Kramp S, Vimtrup AS, Keller J, Jensen TS: A randomized study of the effects of gabapentin on postamputation pain. *ANESTHESIOLOGY* 2006; 105:1008–15
  85. Sen H, Sizlan A, Yanarateş O, Senol MG, Inangil G, Sücüllü I, Ozkan S, Dağlı G: The effects of gabapentin on acute and chronic pain after inguinal herniorrhaphy. *Eur J Anaesthesiol* 2009; 26:772–6
  86. Ucak A, Onan B, Sen H, Selcuk I, Turan A, Yilmaz AT: The effects of gabapentin on acute and chronic postoperative pain after coronary artery bypass graft surgery. *J Cardiothorac Vasc Anesth* 2011; 25:824–9
  87. Jiang Y, Li J, Lin H, Huang Q, Wang T, Zhang S, Zhang Q, Rong Z, Xiong J: The efficacy of gabapentin in reducing pain intensity and morphine consumption after breast cancer surgery: A meta-analysis. *Medicine (Baltimore)* 2018; 97:e11581
  88. Doha NM, Rady A, El Azab SR: Preoperative use of gabapentin decreases the anesthetic and analgesic requirements in patients undergoing radical mastectomy. *Egypt J Anaesth* 2010; 26
  89. Cui X, Liu F, Liu P, Jing F, Liu Y, Ma C, Zhang L: Effect of gabapentin on patient controlled intravenous analgesia after modified radical mastectomy. *Chinese Journal of Postgraduates of Medicine* 2010; 33:13–6
  90. Beaussier M, Parc Y, Guechot J, Cachanado M, Rousseau A, Lescot T; CATCH Study Investigators: Ropivacaine preperitoneal wound infusion for pain relief and prevention of incisional hyperalgesia after laparoscopic colorectal surgery: A randomized, triple-arm, double-blind controlled evaluation vs intravenous lidocaine infusion, the CATCH study. *Colorectal Dis* 2018; 20:509–19
  91. Choi KW, Nam KH, Lee JR, Chung WY, Kang SW, Joe YE, Lee JH: The effects of intravenous lidocaine infusions on the quality of recovery and chronic pain after robotic thyroidectomy: A randomized, double-blinded, controlled study. *World J Surg* 2017; 41:1305–12
  92. Ibrahim A, Aly M, Farrag W: Effect of intravenous lidocaine infusion on long-term postoperative pain after spinal fusion surgery. *Medicine (Baltimore)* 2018; 97:e0229
  93. Kendall MC, McCarthy RJ, Panaro S, Goodwin E, Bialek JM, Nader A, De Oliveira GS Jr: The effect of intraoperative systemic lidocaine on postoperative persistent pain using initiative on methods, measurement, and pain assessment in clinical trials criteria assessment following breast cancer surgery: A randomized, double-blind, placebo-controlled trial. *Pain Pract* 2018; 18:350–9
  94. Kim MH, Lee KY, Park S, Kim SI, Park HS, Yoo YC: Effects of systemic lidocaine versus magnesium administration on postoperative functional recovery and chronic pain in patients undergoing breast cancer surgery: A prospective, randomized, double-blind, comparative clinical trial. *PLoS One* 2017; 12:e0173026
  95. Martin F, Cherif K, Gentili ME, Enel D, Abe E, Alvarez JC, Mazoit JX, Chauvin M, Bouhassira D, Fletcher D:

- Lack of impact of intravenous lidocaine on analgesia, functional recovery, and nociceptive pain threshold after total hip arthroplasty. *ANESTHESIOLOGY* 2008; 109:118–23
96. Terkawi AS, Sharma S, Durieux ME, Thammishetti S, Brenin D, Tiouririne M: Perioperative lidocaine infusion reduces the incidence of post-mastectomy chronic pain: A double-blind, placebo-controlled randomized trial. *Pain Physician* 2015; 18:E139–46
  97. Grigoras A, Lee P, Sattar F, Shorten G: Perioperative intravenous lidocaine decreases the incidence of persistent pain after breast surgery. *Clin J Pain* 2012; 28:567–72
  98. Chang YC, Liu CL, Liu TP, Yang PS, Chen MJ, Cheng SP: Effect of perioperative intravenous lidocaine infusion on acute and chronic pain after breast surgery: A meta-analysis of randomized controlled trials. *Pain Pract* 2017; 17:336–43
  99. Bailey M, Corcoran T, Schug S, Toner A: Perioperative lidocaine infusions for the prevention of chronic postsurgical pain: a systematic review and meta-analysis of efficacy and safety. *Pain* 2018; 159:1696–704
  100. Schroer WC, Diesfeld PJ, LeMarr AR, Reedy ME: Benefits of prolonged postoperative cyclooxygenase-2 inhibitor administration on total knee arthroplasty recovery: A double-blind, placebo-controlled study. *J Arthroplasty* 2011; 26:2–7
  101. Comez M, Celik M, Dostbil A, Aksoy M, Ahiskalioglu A, Erdem AF, Aydin Y, Ince I: The effect of pre-emptive intravenous dexketoprofen + thoracic epidural analgesia on the chronic post-thoracotomy pain. *Int J Clin Exp Med* 2015; 8:8101–7
  102. Sun M, Liao Q, Wen L, Yan X, Zhang F, Ouyang W: Effect of perioperative intravenous flurbiprofen axetil on chronic postmastectomy pain. *Zhong Nan Da Xue Bao Yi Xue Ban* 2013; 38:653–60
  103. Ling XM, Fang F, Zhang XG, Ding M, Liu QA, Cang J: Effect of parecoxib combined with thoracic epidural analgesia on pain after thoracotomy. *J Thorac Dis* 2016; 8:880–7
  104. van Helmond N, Steegers MA, Filippini-de Moor GP, Vissers KC, Wilder-Smith OH: Hyperalgesia and persistent pain after breast cancer surgery: A prospective randomized controlled trial with perioperative COX-2 inhibition. *PLoS One* 2016; 11:e0166601
  105. Fransen M, Anderson C, Douglas J, MacMahon S, Neal B, Norton R, Woodward M, Cameron ID, Crawford R, Lo SK, Tregonning G, Windolf M; HIPAID Collaborative Group: Safety and efficacy of routine postoperative ibuprofen for pain and disability related to ectopic bone formation after hip replacement surgery (HIPAID): Randomised controlled trial. *BMJ* 2006; 333:519
  106. Lakdja F, Dixmérias F, Bussièrès E, Fonrouge JM, Lobéra A: [Preventive analgesic effect of intraoperative administration of ibuprofen-arginine on postmastectomy pain syndrome]. *Bull Cancer* 1997; 84:259–63
  107. Romundstad L, Breivik H, Roald H, Skolleborg K, Romundstad PR, Stubhaug A: Chronic pain and sensory changes after augmentation mammoplasty: Long term effects of preincisional administration of methylprednisolone. *Pain* 2006; 124:92–9
  108. Jeyamohan SB, Kenning TJ, Petronis KA, Feustel PJ, Drazin D, DiRisio DJ: Effect of steroid use in anterior cervical discectomy and fusion: A randomized controlled trial. *J Neurosurg Spine* 2015; 23:137–43
  109. Nielsen RV, Fomsgaard J, Mathiesen O, Dahl JB: The effect of preoperative dexamethasone on pain 1 year after lumbar disc surgery: A follow-up study. *BMC Anesthesiol* 2016; 16:112
  110. Nielsen RV, Siegel H, Fomsgaard JS, Andersen JDH, Martusevicius R, Mathiesen O, Dahl JB: Preoperative dexamethasone reduces acute but not sustained pain after lumbar disk surgery: A randomized, blinded, placebo-controlled trial. *Pain* 2015; 156:2538–44
  111. Turan A, Belley-Cote EP, Vincent J, Sessler DI, Devereaux PJ, Yusuf S, van Oostveen R, Cordova G, Yared JP, Yu H, Legare JF, Royse A, Rochon A, Nasr V, Ayad S, Quantz M, Lamy A, Whitlock RP: Methylprednisolone does not reduce persistent pain after cardiac surgery. *ANESTHESIOLOGY* 2015; 123:1404–10
  112. Bergeron SG, Kardash KJ, Huk OL, Zukor DJ, Antoniou J: Perioperative dexamethasone does not affect functional outcome in total hip arthroplasty. *Clin Orthop Relat Res* 2009; 467:1463–7
  113. Weis F, Kilger E, Roozendaal B, de Quervain DJ, Lamm P, Schmidt M, Schmölz M, Briegel J, Schelling G: Stress doses of hydrocortisone reduce chronic stress symptoms and improve health-related quality of life in high-risk patients after cardiac surgery: A randomized study. *J Thorac Cardiovasc Surg* 2006; 131:277–82
  114. Koyuncu O, Hakimoglu S, Ugur M, Akkurt C, Turhanoglu S, Sessler D, Turan A: Acetaminophen reduces acute and persistent incisional pain after hysterectomy. *Ann Ital Chir* 2018; 89:357–66
  115. Turan A, Karimi N, Zimmerman NM, Mick SL, Sessler DI, Mamoun N: Intravenous acetaminophen does not decrease persistent surgical pain after cardiac surgery. *J Cardiothorac Vasc Anesth* 2017; 31:2058–64
  116. Eisenberg E, Pud D, Koltun L, Loven D: Effect of early administration of the N-methyl-d-aspartate receptor antagonist amantadine on the development of postmastectomy pain syndrome: A prospective pilot study. *J Pain* 2007; 8:223–9
  117. Yazdani J, Aghamohamadi D, Amani M, Mesgarzadeh AH, Maghbooli Asl D, Poulak T: Effect of preoperative oral amantadine on acute and chronic postoperative pain after mandibular fracture surgery. *Anesth Pain Med* 2016; 6:e35900

118. Han C, Lei D, Jiang W, Ren H, Su G, Feng S, Ge Z, Ma T: Pre-emptive dexmedetomidine decreases the incidence of chronic post hysterectomy pain. *Int J Clin Exp Med* 2019; 12:967–71
119. Ilkjaer S, Bach LF, Nielsen PA, Wernberg M, Dahl JB: Effect of preoperative oral dextromethorphan on immediate and late postoperative pain and hyperalgesia after total abdominal hysterectomy. *Pain* 2000; 86:19–24
120. Hyer L, Scott C, Mullen CM, McKenzie LC, Robinson JS: Randomized double-blind placebo trial of duloxetine in perioperative spine patients. *J Opioid Manag* 2015; 11:147–55
121. YaDeau JT, Brummett CM, Mayman DJ, Lin Y, Goytizolo EA, Padgett DE, Alexiades MM, Kahn RL, Jules-Elysee KM, Fields KG, Goon AK, Gadulov Y, Westrich G: Duloxetine and subacute pain after knee arthroplasty when added to a multimodal analgesic regimen: A randomized, placebo-controlled, triple-blinded trial. *ANESTHESIOLOGY* 2016; 125:561–72
122. Cohen SP, Galvagno SM, Plunkett A, Harris D, Kurihara C, Turabi A, Rehrig S, Buckenmaier CC III, Chelly JE: A multicenter, randomized, controlled study evaluating preventive etanercept on postoperative pain after inguinal hernia repair. *Anesth Analg* 2013; 116:455–62
123. Karanikolas M, Aretha D, Tsolakis I, Monantera G, Kiekkas P, Papadoulas S, Swarm RA, Filos KS: Optimized perioperative analgesia reduces chronic phantom limb pain intensity, prevalence, and frequency: A prospective, randomized, clinical trial. *ANESTHESIOLOGY* 2011; 114:1144–54
124. Schley M, Topfner S, Wiech K, Schaller HE, Konrad CJ, Schmelz M, Birbaumer N: Continuous brachial plexus blockade in combination with the NMDA receptor antagonist memantine prevents phantom pain in acute traumatic upper limb amputees. *Eur J Pain* 2007; 11:299–308
125. Fassoulaki A, Sarantopoulos C, Melemenis A, Hogan Q: Regional block and mexiletine: the effect on pain after cancer breast surgery. *Reg Anesth Pain Med* 2001; 26:223–8
126. Martinez V, Szekely B, Lemarié J, Martin F, Gentili M, Ben Ammar S, Lepeintre JF, Garreau de Loubresse C, Chauvin M, Bouhassira D, Fletcher D: The efficacy of a glial inhibitor, minocycline, for preventing persistent pain after lumbar discectomy: a randomized, double-blind, controlled study. *Pain* 2013; 154:1197–203
127. Curtin CM, Kenney D, Suarez P, Hentz VR, Hernandez-Boussard T, Mackey S, Carroll IR: A double-blind placebo randomized controlled trial of minocycline to reduce pain after carpal tunnel and trigger finger release. *J Hand Surg Am* 2017; 42:166–74
128. Na HS, Oh AY, Koo BW, Lim DJ, Ryu JH, Han JW: Preventive analgesic efficacy of nefopam in acute and chronic pain after breast cancer surgery: A prospective, double-blind, and randomized trial. *Medicine (Baltimore)* 2016; 95:e3705
129. Ok YM, Cheon JH, Choi EJ, Chang EJ, Lee HM, Kim KH: Nefopam Reduces Dysesthesia after Percutaneous Endoscopic Lumbar Discectomy. *Korean J Pain* 2016; 29:40–7
130. Kim BG, Moon JY, Choi JY, Park IS, Oh AY, Jeon YT, Hwang JW, Ryu JH: The effect of intraoperative nefopam administration on acute postoperative pain and chronic discomfort after robotic or endoscopic assisted thyroidectomy: A randomized clinical trial. *World J Surg* 2018; 42:2094–101
131. Chan MT, Peyton PJ, Myles PS, Leslie K, Buckley N, Kasza J, Paech MJ, Beattie WS, Sessler DI, Forbes A, Wallace S, Chen Y, Tian Y, Wu WK; and the Australian and New Zealand College of Anaesthetists Clinical Trials Network for the ENIGMA-II investigators: Chronic postsurgical pain in the Evaluation of Nitrous Oxide in the Gas Mixture for Anaesthesia (ENIGMA)-II trial. *Br J Anaesth* 2016; 117:801–11
132. Chan MTV, Wan ACM, Gin T, Leslie K, Myles PS: Chronic postsurgical pain after nitrous oxide anesthesia. *Pain* 2011; 152:2514–20
133. Buchheit T, Hsia HJ, Cooter M, Shortell C, Kent M, McDuffie M, Shaw A, Buckenmaier CT, Van de Ven T: The impact of surgical amputation and valproic acid on pain and functional trajectory: Results from the Veterans Integrated Pain Evaluation Research (VIPER) randomized, double-blinded placebo-controlled trial. *Pain Med* 2019; 20:2004–17
134. Lee GW, Yang HS, Yeom JS, Ahn MW: The efficacy of vitamin C on postoperative outcomes after posterior lumbar interbody fusion: A randomized, placebo-controlled trial. *Clin Orthop Surg* 2017; 9:317–24
135. Nüesch E, Trelle S, Reichenbach S, Rutjes AW, Tschannen B, Altman DG, Egger M, Jüni P: Small study effects in meta-analyses of osteoarthritis trials: Meta-epidemiological study. *BMJ* 2010; 341:c3515
136. Bender R, Bunce C, Clarke M, Gates S, Lange S, Pace NL, Thorlund K: Attention should be given to multiplicity issues in systematic reviews. *J Clin Epidemiol* 2008; 61:857–65
137. Verret M, Lauzier F, Zarychanski R, Perron C, Savard X, Pinard AM, Leblanc G, Cossi MJ, Neveu X, Turgeon AF; Canadian Perioperative Anesthesia Clinical Trials (PACT) Group: Perioperative use of gabapentinoids for the management of postoperative acute pain: A systematic review and meta-analysis. *ANESTHESIOLOGY* 2020; 133:265–79
138. Nussmeier NA, Whelton AA, Brown MT, Langford RM, Hoefft A, Parlow JL, Boyce SW, Verburg KM: Complications of the COX-2 inhibitors parecoxib and valdecoxib after cardiac surgery. *N Engl J Med* 2005; 352:1081–91
139. Myhre M, Jacobsen HB, Andersson S, Stubhaug A: Cognitive effects of perioperative pregabalin:

Secondary exploratory analysis of a randomized placebo-controlled study. *ANESTHESIOLOGY* 2019; 130:63–71

140. Hoffer D, Smith SM, Parlow J, Allard R, Gilron I: Adverse event assessment and reporting in trials of newer treatments for post-operative pain. *Acta Anaesthesiol Scand* 2016; 60:842–51
141. Smith SM, Wang AT, Katz NP, McDermott MP, Burke LB, Coplan P, Gilron I, Hertz SH, Lin AH, Rappaport BA, Rowbotham MC, Sampaio C, Sweeney M, Turk DC, Dworkin RH: Adverse event assessment, analysis, and reporting in recent published analgesic clinical trials: ACTION systematic review and recommendations. *Pain* 2013; 154:997–1008

## ANESTHESIOLOGY REFLECTIONS FROM THE WOOD LIBRARY-MUSEUM

# Mouth Props: Vulcanite Takes a Bite Out of Dental Anesthesia

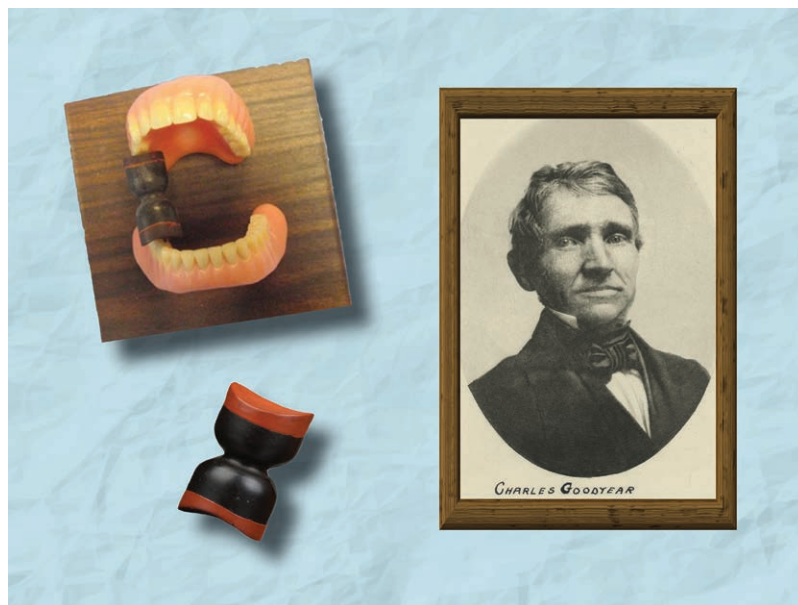

Unassuming in appearance yet essential for dental anesthetics, the mid-nineteenth century mouth prop (*upper and bottom left*) could not have made its mark without Charles Goodyear (1800 to 1860, *right*) and his creation of vulcanized rubber. Even when expertly placed, early wooden mouth props quickly splintered under the pressure of clenched jaws. A durable alternative was needed. Before the “Good” years of vulcanized rubber, North American rubber products would often melt in the summer and crack in the winter. Determined to develop an enduring material for life preservers, Goodyear heated rubber and sulfur to “vulcanize” the compound. As the popularity of anesthetics for “painless” dental extractions generated significant demand for affordable dentures, dentists became key consumers of vulcanized rubber. “Vulcanite” was easy to implement as bite block material. Eventually, the wealthy Goodyear Dental Vulcanite Company began to enforce patents and collect high royalties. Tensions culminated in the 1879 murder of its financial director by a dentist. Taking the hint, the company did not renew its denture patents. By the turn of the twentieth century, vulcanite dentures and mouth props enjoyed near-ubiquity in dental practices. (Copyright © the American Society of Anesthesiologists’ Wood Library–Museum of Anesthesiology, Schaumburg, Illinois.)

*Melissa L. Coleman, M.D., Penn State College of Medicine, Hershey, Pennsylvania, and Jane S. Moon, M.D., University of California, Los Angeles, California.*
